# 1 **Dengue modeling in rural Cambodia: statistical performance** 2 **versus epidemiological relevance**

3 Clara CHAMPAGNE \*<sup>1,2</sup>, Richard PAUL<sup>3,4</sup>, Sowath LY<sup>6</sup>, Veasna DUONG<sup>5</sup>, Rithea  
4 LEANG<sup>7</sup> and Bernard CAZELLES †<sup>1,3,8</sup>

5 <sup>1</sup>Institut de biologie de l'Ecole normale supérieure (IBENS), Ecole normale supérieure, CNRS, INSERM, PSL Research  
6 University, 75005 Paris, France

7 <sup>2</sup>CREST, ENSAE, Université Paris Saclay, 5 avenue Henry Le Chatelier, 91120 Palaiseau, France

8 <sup>3</sup>Institut Pasteur, Unité de Génétique Fonctionnelle des Maladies Infectieuses, Department of Genomes and Genetics,  
9 F-75724 Paris cedex 15, France

10 <sup>4</sup>Centre National de la Recherche Scientifique, Unité de Recherche associée 3012, Paris, France

11 <sup>5</sup>Institut Pasteur in Cambodia, Virology Unit, Phnom Penh, Cambodia

12 <sup>6</sup>Institut Pasteur in Cambodia, Epidemiology and Public Health Unit, Phnom Penh, Cambodia

13 <sup>7</sup>National Dengue Control Program, Cambodia

14 <sup>8</sup>International Center for Mathematical and Computational Modeling of Complex Systems (UMMISCO), UMI 209  
15 UPMC/IRD, Bondy cedex, France

16 **October 25, 2017**

---

\*champagn@biologie.ens.fr

†cazelles@biologie.ens.fr

## 17 **Abstract**

18 Dengue dynamics are shaped by the complex interplay between several factors, including  
19 vector seasonality, interaction between four virus serotypes, and inapparent infections.  
20 However, paucity or quality of data do not allow for all of these to be taken into account  
21 in mathematical models. In order to explore separately the importance of these factors in  
22 models, we combined surveillance data with a local-scale cluster study in the rural province  
23 of Kampong Cham (Cambodia), in which serotypes and asymptomatic infections were  
24 documented. We formulate several mechanistic models, each one relying on a different set  
25 of hypotheses, such as explicit vector dynamics, transmission via asymptomatic infections  
26 and coexistence of several virus serotypes. Models are confronted with the observed time  
27 series using Bayesian inference, through Markov chain Monte Carlo. Model selection is  
28 then performed using statistical information criteria, but also by studying the coherence  
29 of epidemiological characteristics (reproduction numbers, incidence proportion, dynamics  
30 of the susceptible class) in each model. Considering the available data, our analyses on  
31 transmission dynamics in a rural endemic setting highlight both the importance of using  
32 two-strain models with interacting effects and the lack of added value of incorporating  
33 vector and explicit asymptomatic components.

## 34 **1 Introduction**

35 Dengue is a vector-borne viral disease transmitted by *Aedes* spp. caused by any of four  
36 dengue virus (DENV) serotypes. Infection can result in a flu-like illness, and sometimes  
37 potentially lethal complications called Dengue Hemorrhagic Fever (DHF) and Dengue  
38 Shock Syndrome (DSS), although a significant proportion are subclinical or asymptomatic,  
39 causing insufficient discomfort for clinical presentation [1]. Dengue is ubiquitous in the  
40 tropics and the subtropics, particularly in Southeast Asia, the Pacific and the Americas [2].

41 The World Health Organization (WHO) considers that dengue is a major public health issue  
42 worldwide, with four billion people in 128 countries exposed to the dengue virus [3, 4], an  
43 estimated 390 million infections every year and about 50-100 million symptomatic cases  
44 worldwide and a high disease burden [5, 6]. Nowadays, there are more cases of dengue  
45 worldwide than any other arboviral disease [7, 8, 9].

46  
47 The value of mathematical models and associated statistical tools for investigating public  
48 health policy questions has long been recognized and has provided insights into their  
49 transmission and control for more than one hundred years [10, 11]. It is important, however,  
50 to adapt them as much as possible to a specific setting, in order to derive appropriate public  
51 health recommendations and accurately generate the key parameters using estimation tools,  
52 so that they can produce realistic conclusions, in accordance with the observed data.

53  
54 Dengue dynamics are shaped by the complex interplay between many factors associated  
55 with the mosquito vector and human hosts and their interactions with the virus. Hitherto,  
56 the exploration of dengue dynamics has focused on the urban setting, where the incidence  
57 of dengue is highest [12, 13, 14, 15]. Few studies have been carried out in rural settings [16,  
58 17, 18], despite growing evidence that rural dengue is an increasing problem. Guha-Sapir  
59 and Schimmer [19] observed shifts in modal age, rural spread, and social determinants of  
60 dengue susceptibility, with major implications for health services. Muhammad Azami et  
61 al. [20] observed similar dengue seroprevalence rates between urban and rural samples,  
62 showing that dengue is not confined to urban areas in Malaysia. Chareonsook et al. [21]  
63 showed that DHF in Thailand, which was originally thought to be an urban disease, has  
64 spread to most areas of Thailand, and is now more common in rural than urban areas and  
65 studies suggest that rural dengue incidence can surpass urban and semi-urban communities  
66 within the same region [22, 23]. In addition, several studies have stressed that rural settings  
67 play an important role in the timing of dengue epidemics in Southeast Asia, with the seasonal

68 dengue waves typically arriving later in major urban centers [24, 25, 26].

69

70 In this study, we combine two datasets from rural Cambodia that provide information on  
71 different key factors. We contrast and compare several mechanistic models, incorporating  
72 differing levels of complexity with respect to vector dynamics, coexistence of several virus  
73 strains, and transmission via asymptomatic infections. Models are adapted to the observed  
74 time series using Bayesian inference, through Markov Chain Monte Carlo (MCMC) and  
75 compared in light of the data, using statistical indicators to identify the best model [27, 28,  
76 13, 29]. In addition, we also analyze the epidemiological coherence of the estimated models  
77 in simulations. Critically, we do not merely focus on the observed infected individuals but  
78 also on other compartments, such as the susceptible class of individuals. By comparing  
79 these models, we try to find a realistic but parsimonious way of modeling dengue epidemics  
80 in rural Cambodia. The best model may then be used in the study of intervention scenarios  
81 or in comparative analyses with other settings. For instance, it could be readily expanded  
82 to understand the potential impact of different vaccination strategies in rural settings.

## 83 **2 Methods**

### 84 **2.1 Data**

#### 85 **2.1.1 Study area**

86 Kampong Cham province is a densely populated rural province 120km northeast from  
87 the capital Phnom Penh. Dengue is endemic and strongly seasonal (cf. Figure 1), with  
88 outbreaks occurring every year from June to September, during the rainy season. The four  
89 virus serotypes co-circulate, even though one usually dominates the three others for about  
90 3 to 5 years. We used two different datasets reporting dengue cases in the province: the  
91 results of a punctual study conducted in a 30km radius around the city of Kampong Cham

92 (DENFREE data), and the national surveillance data (NDSS data) in the four districts  
93 comprising the DENFREE study area (Kampong Cham, Kampong Siem, Prey Chhor and  
94 Tboung Khmum, with the administrative divisions of 2012-2013).

95

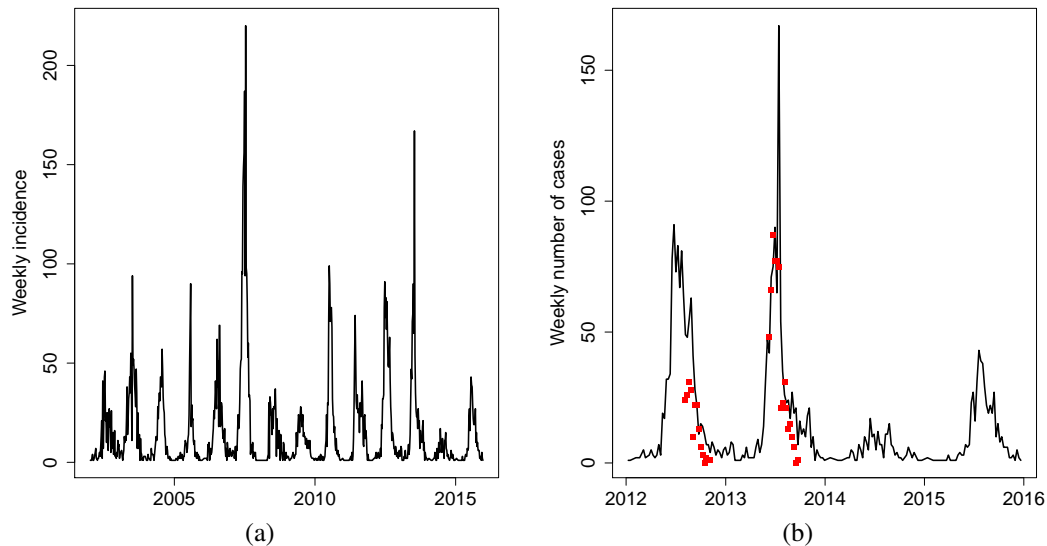

Figure 1 – **a) NDSS data.** Weekly number of cases in the four districts of Kampong Cham province. **b) NDSS and DENFREE data.** The black line gives the series of NDSS cases per week in the four districts of the Kampong Cham province. The red dots are the DENFREE cases per week in the DENFREE study area.

### 96 2.1.2 DENFREE Data

97 The DENFREE study took place in the Kampong Cham region during the 2012 and 2013  
98 outbreaks. Patients with acute dengue-like illness were enrolled in three hospitals in the  
99 Kampong Cham province and DENV infection was confirmed by qRT-PCR. Positive DENV  
100 cases were considered as index cases, and an outbreak investigation was initiated in their  
101 neighbourhood, in order to detect asymptomatic or mildly symptomatic cases. The study  
102 protocol is extensively detailed in Duong et al. [30].

103

104 We used the series of the total number of cases per week (index cases and outbreak  
105 investigation cases) between August 6th (first week when more than 100 people were tested

106 for dengue in outbreak investigation) and November 5th 2012 and between June 10th (first  
107 week with outbreak investigation) and September 23rd 2013. We also restricted the study to  
108 children under 15 years old for two major reasons : most of the reported dengue cases were in  
109 this age class, and it allowed a comparison with other dengue reporting systems in Cambodia,  
110 which are mainly done at paediatric hospitals. Information on the serotype responsible for  
111 infection, and symptomatic/asymptomatic status of the patients were available.

112

| Children under 15 years old             | 2012 | 2013 |
|-----------------------------------------|------|------|
| <b>Observed symptomatic cases</b>       | 189  | 571  |
| Denv-1                                  | 183  | 448  |
| Denv-2, Denv-3, Denv-4                  | 1    | 122  |
| <b>Observed asymptomatic cases</b>      | 4    | 28   |
| <b>Children tested in the community</b> | 1722 | 4119 |

Table 1 – **Number of cases (index cases and community cases) under 15 years old, in the DENFREE study.** Cases are restricted to the period 6th Aug - 5th Nov 2012 and 10th Jun - 23rd Sept 2013. During the whole study, 236 symptomatic cases were collected in 2012 and 574 in 2013. Serotype was unknown for 5 cases in 2012. One case in 2013 was coinfecting with DENV-1 and DENV-2 and was not included in models with two strains (serotypes).

### 113 2.1.3 NDSS Data

114 Because the DENFREE data covers only a relatively short period of time, surveillance data  
115 were added to improve the estimations. Surveillance of dengue is conducted at the national  
116 level in Cambodia, through the National Dengue Surveillance system (NDSS)[31, 24],  
117 involving the paediatric departments of several hospitals throughout the country. Diagnosis  
118 is done clinically and only a small fraction of the cases are confirmed serologically.  
119 Because of the co-circulation of other flaviviruses (Chikungunya, Japanese Encephalitis)  
120 and the relative non-specificity of symptoms, clinical mis-diagnosis may be frequent. Since  
121 surveillance is carried out in paediatric departments, only cases among children under 16  
122 years old are reported.

123

124 We selected all the cases under 15 years old in the four districts involved in the DENFREE  
125 study between January 2002 and December 2015 and aggregated them per week (cf. Figure  
126 1). In this area, on average, 770 cases under 15 years old are reported per year (maximum  
127 1985 cases in 2007, minimum 209 cases in 2014). We used data from 2002 to 2013 for  
128 estimations, and data for 2014 and 2015 as the test set. As displayed in figure 1, NDSS and  
129 DENFREE data have similar dynamics.

| DENFREE                                                                              | NDSS                               |
|--------------------------------------------------------------------------------------|------------------------------------|
| Observations in 2012-2013                                                            | Observations in 2002-2015          |
| No observation during inter-epidemic period, dataset starts during the epidemic peak | Observations all year round        |
| Laboratory confirmation                                                              | Clinical diagnosis                 |
| Observation of non hospitalized cases including some asymptomatic infections         | Hospital cases only                |
| Clustered collecting process                                                         | Stable reporting process over time |
| An observation rate can be estimated                                                 | Unknown observation rate           |
| Known serotype                                                                       | Unknown serotype                   |

Table 2 – Comparison of both datasets

#### 130 2.1.4 Population

131 We take as the reference population (N=161391) the number of children below 15 years old  
132 in four districts of the Kampong Cham province (Kampong Cham, Kampong Siem, Prey  
133 Chhor and Tboung Khmum, with the administrative divisions of 2012-2013) according to  
134 2008 National Census [32]. Since the DENFREE study was conducted in a subpart of this  
135 area, we calculated the total population for the DENFREE study (n=65208) as the sum of  
136 the population of children under 15 years old in all the villages investigated in either 2012  
137 or 2013 [32].

## 138 2.2 Models

139 All model parameters are defined in the figures captions and in Table 3.

140 **2.2.1 One-strain models**

141 We take a Susceptible-Exposed-Infected-Recovered (SEIR) model as the simplest model  
 142 (cf. Figure 2). In this model, the basic reproduction number, i.e. the number of secondary  
 143 human infections resulting from the introduction of a single infected individual in an entirely  
 144 susceptible population, is  $R_0^{SEIR}(t) = \frac{\beta(t)\sigma}{(\gamma+\mu_H)(\sigma+\mu_H)}$ .

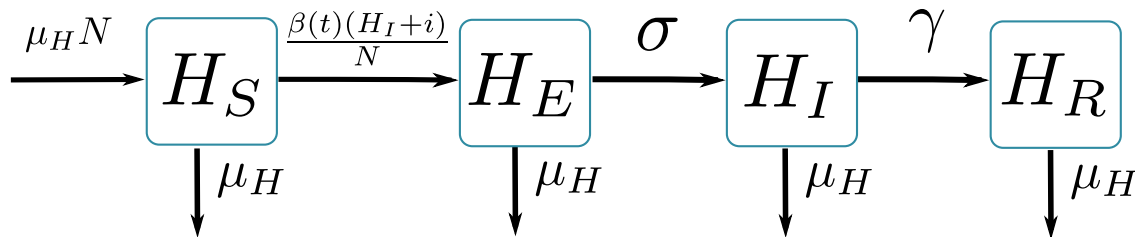

Figure 2 – **Graphical representation of SEIR model.**  $H_S$  susceptible individuals;  $H_E$  infected (not yet infectious) individuals;  $H_I$  infectious individuals;  $H_R$  recovered individuals;  $\beta(t)$  is the transmission parameter;  $\sigma$  is the rate at which  $H_E$ -individuals move to the infectious class  $H_I$ ; infectious individuals ( $H_I$ ) then recover at rate  $\gamma$ ; individuals leave the children population at rate  $\mu_H$ .  $H_S + H_E + H_I + H_R = N$ .

$$\begin{aligned}
 \frac{dH_S}{dt} &= \mu_H N - \beta(t) \frac{(H_I + i)H_S}{N} - \mu_H H_S \\
 \frac{dH_E}{dt} &= \beta(t) \frac{(H_I + i)H_S}{N} - \sigma H_E - \mu_H H_E \\
 \frac{dH_I}{dt} &= \sigma H_E - \gamma H_I - \mu_H H_I \\
 \frac{dH_R}{dt} &= \gamma H_I - \mu_H H_R
 \end{aligned} \tag{1}$$

145 This model is compared with two other models that include the mosquito vector transmission  
 146 components. In the first one, derived from Pandey et al. [29], the vector is modelled  
 147 explicitly with three compartments (Susceptible-Exposed-Infected) (cf. Figure 3). In  
 148 the second one, derived from Laneri et al.[33], the vector is modelled implicitly as an



149 external force of infection including two stages, latent ( $\kappa$ ) and current ( $\lambda$ ) (cf. Figure 4).  
 150 We derived  $R_0$  for each model as  $R_0^{Pandey}(t) = \frac{\beta_H \beta_V(t) \sigma \tau}{(\gamma + \mu_H)(\sigma + \mu_H) \mu_V (\mu_V + \tau)}$  and the estimation  
 151  $R_0^{Laneri}(t) = \frac{\beta(t) \sigma}{(\gamma + \mu_H)(\sigma + \mu_H)}$  [34]. In order to compare these models with the non-vector  
 152 models, we considered the same definition (i.e. the number of secondary human infections  
 153 resulting from the introduction of a single infected individual in a entirely susceptible  
 154 population), and not the reproduction ratio per generation provided through the use of the  
 155 next generation matrix.

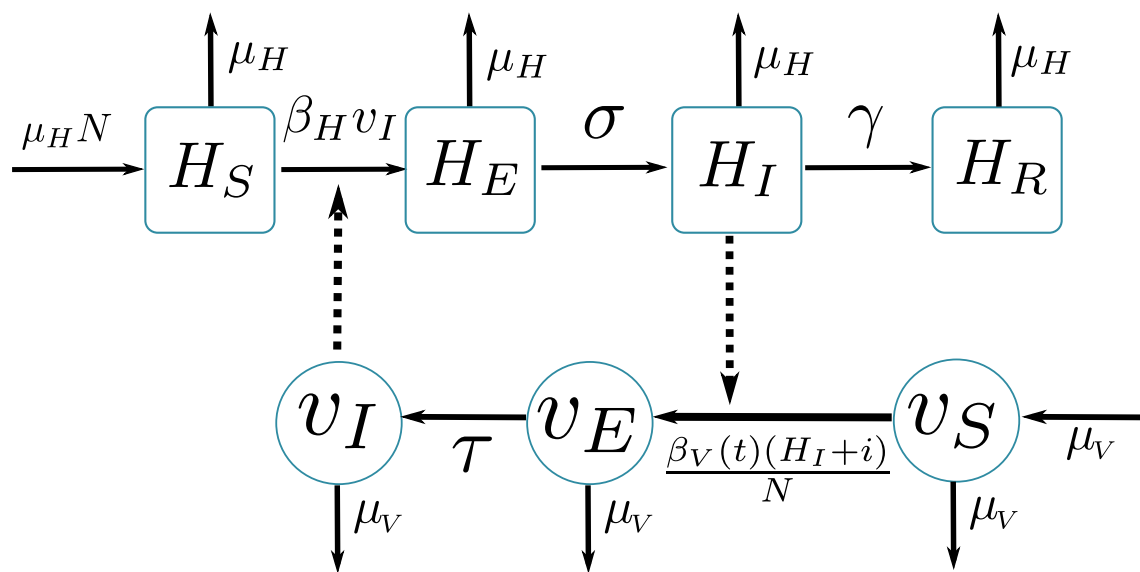

Figure 3 – Graphical representation of Pandey model [29]. Squared boxes and circles correspond respectively to human and vector compartments. Plain arrows represent transitions from one state to the next. Dashed arrows indicate interactions between humans and vectors.  $H_S$  susceptible individuals;  $H_E$  infected (not yet infectious) individuals;  $H_I$  infectious individuals;  $H_R$  recovered individuals;  $\beta_H$  is the transmission parameter from vector to human;  $\sigma$  is the rate at which  $H_E$ -individuals move to the infectious class  $H_I$ ; infectious individuals ( $H_I$ ) then recover at rate  $\gamma$ ; individuals leave the children population at rate  $\mu_H$ ;  $H_S + H_E + H_I + H_R = N$ ;  $v_S$  proportion of susceptible vectors;  $v_E$  proportion of infected (not yet infectious) vectors;  $v_I$  proportion of infectious vectors;  $\beta_V(t)$  is the transmission parameter from human to vector;  $\tau$  is the rate at which  $v_E$ -vectors move to the infectious class  $v_I$ ; vectors die at rate  $\mu_V$ .

156 The equations describing the Pandey model are:

$$\begin{aligned}\frac{dH_S}{dt} &= \mu_H N - \beta_H v_I H_S - \mu_H H_S \\ \frac{dH_E}{dt} &= \beta_H v_I H_S - \sigma H_E - \mu_H H_E \\ \frac{dH_I}{dt} &= \sigma H_E - \gamma H_I - \mu_H H_I \\ \frac{dH_R}{dt} &= \gamma H_I - \mu_H H_R \\ \frac{dv_S}{dt} &= \mu_V - \beta_V(t) \frac{(H_I + i)}{N} v_S - \mu_V v_S \\ \frac{dv_E}{dt} &= \beta_V(t) \frac{(H_I + i)}{N} v_S - \tau v_E - \mu_V v_E \\ \frac{dv_I}{dt} &= \tau v_E - \mu_V v_I\end{aligned}\tag{2}$$

157 where  $v_S$  is the proportion of susceptible mosquitoes,  $v_E$  the proportion of exposed mosquitoes,  
158 and  $v_I$  the proportion of infected mosquitoes.

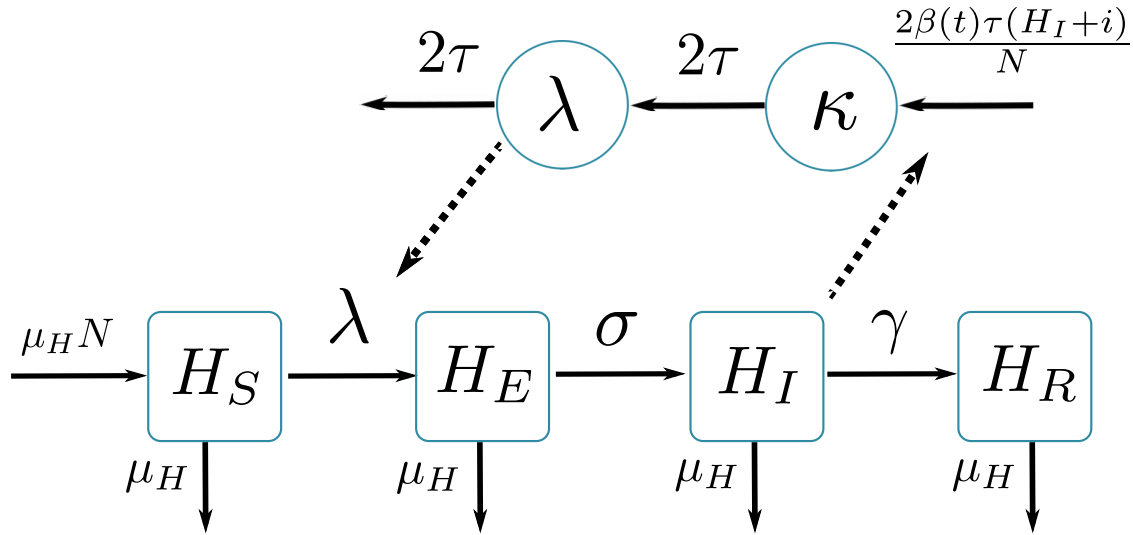

Figure 4 – **Graphical representation of Laneri model [33]**. Squared boxes and circles correspond respectively to human and vector compartments. Plain arrows represent transitions from one state to the next. Dashed arrows indicate interactions between humans and vectors.  $H_S$  susceptible individuals;  $H_E$  infected (not yet infectious) individuals;  $H_I$  infectious individuals;  $H_R$  recovered individuals;  $\sigma$  is the rate at which  $H_E$ -individuals move to the infectious class  $H_I$ ; infectious individuals ( $H_I$ ) then recover at rate  $\gamma$ ; individuals leave the children population at rate  $\mu_H$ ;  $H_S + H_E + H_I + H_R = N$ ; implicit vector-borne transmission is modelled with the compartments  $\kappa$  and  $\lambda$ ;  $\lambda$  current force of infection;  $\kappa$  latent force of infection reflecting the exposed state for mosquitoes during the extrinsic incubation period;  $\beta(t)$  is the transmission parameter;  $\tau$  is the transition rate associated with the extrinsic incubation period.

159 The equations describing the Laneri model are:

$$\begin{aligned}
 \frac{dH_S}{dt} &= \mu_H N - \lambda H_S - \mu_H H_S \\
 \frac{dH_E}{dt} &= \lambda H_S - \sigma H_E - \mu_H H_E \\
 \frac{dH_I}{dt} &= \sigma H_E - \gamma H_I - \mu_H H_I \\
 \frac{dH_R}{dt} &= \gamma H_I - \mu_H H_R \\
 \frac{d\kappa}{dt} &= \beta(t) \frac{2(H_I + i)\tau}{N} - 2\tau\kappa \\
 \frac{d\lambda}{dt} &= 2\tau\kappa - 2\tau\lambda
 \end{aligned} \tag{3}$$

160 **2.2.2 Model with explicit asymptomatic individuals (SEIAR)**

161 We also consider a model in which asymptomatic infections are explicitly taken into account  
162 in the transmission process (cf. Figure 5). In this model, we assume that, after the incubation  
163 period, there are three possible manifestations of the disease: asymptomatic ( $H_A$ ), mildly  
164 symptomatic not requiring hospitalization ( $H_I$ ) and hospitalized cases ( $H_H$ ). Asymptomatic  
165 cases are defined in the dengue study as asymptomatic or pauci-symptomatic (presence  
166 of other symptoms not being sufficient to classify as symptomatic). Hospital cases are  
167 defined as NDSS cases (reported by the surveillance system in hospitals). We assume that  
168 symptomatic DENFREE cases are either ( $H_I$ ) or ( $H_H$ ). We also assume that asymptomatic  
169 cases transmit the disease as much as symptomatic cases, as recently shown [30], and  
170 therefore,  $R_0^{SEIAR}(t) = \frac{\beta(t)\sigma}{(\gamma+\mu_H)(\sigma+\mu_H)}$ .

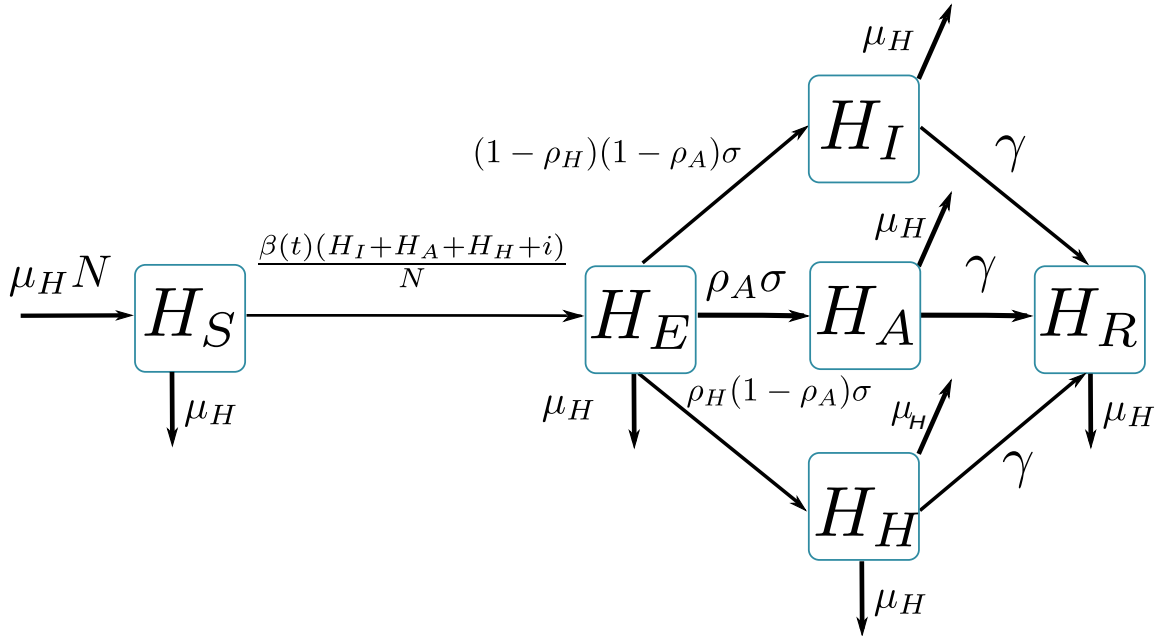

Figure 5 – **Graphical representation of SEIAR model.**  $H_S$  susceptible individuals;  $H_E$  infected (not yet infectious) individuals;  $H_A$  asymptomatic infectious individuals;  $H_I$  mildly symptomatic infectious individuals;  $H_H$  hospitalized infectious individuals;  $H_R$  recovered individuals;  $\beta(t)$  is the transmission parameter;  $\sigma$  is the rate at which  $H_E$ -individuals move to the infectious classes  $H_I$ ,  $H_A$  and  $H_H$ ; a proportion  $\rho_A$  of  $H_E$ -individuals do not show symptoms during the infectious period; a proportion  $\rho_H$  of symptomatic individuals go to hospital; infectious individuals ( $H_I, H_A, H_H$ ) then recover at rate  $\gamma$ ; individuals leave the children population at rate  $\mu_H$ .  $H_S + H_E + H_A + H_I + H_H + H_R = N$ .

$$\begin{aligned}
 \frac{dH_S}{dt} &= \mu_H N - \beta(t) \frac{(H_I + H_A + H_H + i)H_S}{N} - \mu_H H_S \\
 \frac{dH_E}{dt} &= \beta(t) \frac{(H_I + H_A + H_H + i)H_S}{N} - \sigma H_E - \mu_H H_E \\
 \frac{dH_A}{dt} &= \rho_A \sigma H_E - \gamma H_A - \mu_H H_A \\
 \frac{dH_H}{dt} &= \rho_H (1 - \rho_A) \sigma H_E - \gamma H_H - \mu_H H_H \\
 \frac{dH_I}{dt} &= (1 - \rho_H)(1 - \rho_A) \sigma H_E - \gamma H_I - \mu_H H_I \\
 \frac{dH_R}{dt} &= \gamma (H_I + H_A + H_H) - \mu_H H_R
 \end{aligned} \tag{4}$$

171 **2.2.3 Model with two virus serotypes**

172 In the 2012 and 2013 epidemics, DENV-1 was highly dominant : the three other serotypes  
 173 represented less than 1% of the cases reported in the DENFREE study in 2012 and about  
 174 20% in 2013 (cf. Table 1). Therefore, a two-strain model is also studied, in which we  
 175 separate DENV-1 cases from DENV-2, DENV-3 and DENV-4 combined (cf. Figure 6).  
 176 For simplicity and parsimony in the number of parameters, the two strains share the same  
 177 parameter values. We first assume both strains to be independent ( $\psi = 1$  in equation 5,  
 178 called SEIR2 model). In this context, the reproduction numbers for each strain are equal,

179  $R_0^{SEIR2_1}(t) = R_0^{SEIR2_2}(t) = \frac{\beta(t)\sigma}{(\gamma+\mu_H)(\sigma+\mu_H)}$ .

180

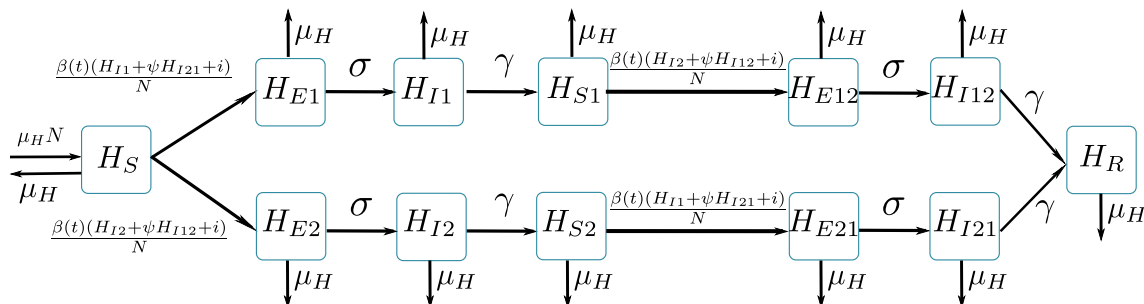

**Figure 6 – Graphical representation of SEIR2 models.**  $H_S$  individuals susceptible to both strains;  $H_{E1}$  (resp.  $H_{E2}$ ) individuals infected (not yet infectious) to strain 1 (resp. strain 2);  $H_{I1}$  (resp.  $H_{I2}$ ) individuals infectious to strain 1 (resp. strain 2);  $H_{S1}$  (resp.  $H_{S2}$ ) individuals immune to strain 1 only (resp. strain 2);  $H_{E12}$  (resp.  $H_{E21}$ ) individuals (not yet infectious) with a secondary infection to strain 2 (resp. strain 1);  $H_{I12}$  (resp.  $H_{I21}$ ) infectious individuals with a secondary infection to strain 2 (resp. strain 1);  $H_R$  individuals immune to both strains;  $\beta(t)$  is the transmission parameter;  $\sigma$  is the rate at which exposed individuals move to the infectious class; infectious individuals then recover at rate  $\gamma$ ;  $\psi$  is the change in infectivity for secondary infected individuals in SEIR2psi model (in SEIR2 model,  $\psi = 1$ ); individuals leave the children population at rate  $\mu_H$ .  $H_S + H_{E1} + H_{E2} + H_{I1} + H_{I2} + H_{S1} + H_{S2} + H_{E12} + H_{E21} + H_{I12} + H_{I21} + H_R = N$ .

$$\begin{aligned}
 \frac{dH_S}{dt} &= \mu_H N - \beta(t) \frac{(H_{I1} + \psi H_{I21} + i)H_S}{N} - \beta(t) \frac{(H_{I2} + \psi H_{I12} + i)H_S}{N} - \mu_H H_S \\
 \frac{dH_{E1}}{dt} &= \beta(t) \frac{(H_{I1} + \psi H_{I21} + i)H_S}{N} - \sigma H_{E1} - \mu_H H_{E1} \\
 \frac{dH_{I1}}{dt} &= \sigma H_{E1} - \gamma H_{I1} - \mu_H H_{I1} \\
 \frac{dH_{S1}}{dt} &= \gamma H_{I1} - \beta(t) \frac{(H_{I2} + \psi H_{I12} + i)H_{S1}}{N} - \mu_H H_{S1} \\
 \frac{dH_{E12}}{dt} &= \beta(t) \frac{(H_{I2} + \psi H_{I12} + i)H_{S1}}{N} - \sigma H_{E12} - \mu_H H_{E12} \\
 \frac{dH_{I12}}{dt} &= \sigma H_{E12} - \gamma H_{I12} - \mu_H H_{I12} \\
 \frac{dH_{E2}}{dt} &= \beta(t) \frac{(H_{I2} + \psi H_{I12} + i)H_S}{N} - \sigma H_{E2} - \mu_H H_{E2} \\
 \frac{dH_{I2}}{dt} &= \sigma H_{E2} - \gamma H_{I2} - \mu_H H_{I2} \\
 \frac{dH_{S2}}{dt} &= \gamma H_{I2} - \beta(t) \frac{(H_{I1} + \psi H_{I21} + i)H_{S2}}{N} - \mu_H H_{S2} \\
 \frac{dH_{E21}}{dt} &= \beta(t) \frac{(H_{I1} + \psi H_{I21} + i)H_{S2}}{N} - \sigma H_{E21} - \mu_H H_{E21} \\
 \frac{dH_{I21}}{dt} &= \sigma H_{E21} - \gamma H_{I21} - \mu_H H_{I21} \\
 \frac{dH_R}{dt} &= \gamma(H_{I12} + H_{I21}) - \mu_H H_R
 \end{aligned} \tag{5}$$

181 We also considered another version of the model including interaction between strains, in  
 182 order to reflect the fact that secondary infection with a heterologous serotype leads more  
 183 often than primary infection to severe manifestations of the disease [7]. In our model  
 184 (called SEIRpsi model), primary and secondary infections differ in infectiousness, through  
 185 a parameter  $\psi$  [35]. This parameter is estimated between zero and three: values superior  
 186 to 1 correspond to transmission cross-enhancement (because of higher virus titers during  
 187 secondary infections [35]) and values inferior to 1 suggest a lower infectivity for secondary  
 188 infected individuals (for example because they are hospitalized and less in contact with  
 189 the population [36]). As in Ferguson et al. [35], we define  $R_0^{SEIR2_1}(t) = R_0^{SEIR2_2}(t) =$   
 190  $\frac{\beta(t)\sigma}{(\gamma + \mu_H)(\sigma + \mu_H)}$  the basic reproduction number for each strain.

191

192 In the DENFREE data, DENV-1 cases are assumed to be either  $H_{I1}$  or  $H_{I21}$  and DENV-2/  
193 DENV-3/ DENV-4 cases  $H_{I2}$  or  $H_{I12}$ . In the NDSS data, observed cases are assumed to be  
194  $H_{I1}$ ,  $H_{I2}$ ,  $H_{I12}$  or  $H_{I21}$ .

#### 195 **2.2.4 Seasonality**

196 All models include seasonality through the use of a time-varying transmission parameter  
197  $\beta(t) = \beta[1 + b \cdot \sin(2\pi(\frac{t}{365} + p))]$ , according to a sinusoidal function whose phase  $p$  and  
198 amplitude  $b$  are estimated.

199 We also assume that a constant number of cases  $i$  are imported.

### 200 **2.3 Prior distributions**

201 The prior distributions are listed in Table 3.



| Parameter                                             |                                           | Prior distribution               | Reference | Models                                      |
|-------------------------------------------------------|-------------------------------------------|----------------------------------|-----------|---------------------------------------------|
| <b>Infectiousness, incubation and mortality rates</b> |                                           |                                  |           |                                             |
| $\gamma^{-1}$                                         | infectious period (days)                  | 4.5                              | [3]       | All                                         |
| $\sigma^{-1}$                                         | intrinsic incubation period (days)        | 5.9                              | [37]      | Pandey, Laneri                              |
| $\tau^{-1}$                                           | extrinsic incubation period (days)        | 10                               | [37]      | Pandey, Laneri                              |
| $\sigma^{-1}$                                         | both incubation periods (days)            | 15.9                             | [37]      | SEIR, SEIAR, SEIR2, SEIR2psi                |
| $\mu_H^{-1}$                                          | age duration (years)                      | 15                               | assumed   | All                                         |
| $\mu_V^{-1}$                                          | mosquito lifespan (days)                  | 15                               | [38]      | Pandey                                      |
| <b>Transmission parameters</b>                        |                                           |                                  |           |                                             |
| $R_0$                                                 | average basic reproduction number         | Uniform[0, 20]                   | assumed   | All                                         |
| $\beta_V$                                             | transmission from human to mosquito       | Uniform[0.1, 2]                  | [29]      | Pandey                                      |
| $\psi$                                                | inh./enh. of infectiousness               | Uniform[0, 3]                    | [39]      | SEIR2psi                                    |
| <b>Initial conditions</b>                             |                                           |                                  |           |                                             |
| $H_I(0)$                                              | Initial number of infected individuals    | Uniform[0, 100]                  | assumed   | SEIR, Pandey, Laneri                        |
| $H_E(0)$                                              | Initial number of exposed individuals     | $H_I(0)$                         | assumed   | SEIR, Pandey, Laneri, ( $3H_I(0)$ in SEIAR) |
| $H_S(0)$                                              | Initial number of susceptible individuals | N*Normal(0.44, 0.05) in [0.2, 1] | [40]      | All                                         |
| $v_I(0)$ or $\lambda(0)$                              | Initial number of infected mosquitoes     | Uniform[ $10^{-6}$ , $10^{-3}$ ] | assumed   | Pandey or Laneri                            |
| $v_E(0)$ or $\kappa(0)$                               | Initial number of exposed mosquitoes      | $v_I(0)$ or $\lambda(0)$         | assumed   | Pandey or Laneri                            |
| $H_H(0), H_A(0)$                                      | Initial number of exposed individuals     | $H_I(0)$                         | assumed   | SEIAR                                       |
| $H_{S1}(0), H_{S2}(0)$                                | Initial number of exposed individuals     | N*Uniform[0.1, 1]                | assumed   | SEIR2, SEIR2psi                             |
| $H_{I1}(0), H_{I2}(0)$                                | Initial number of exposed individuals     | Uniform[0, 100]                  | assumed   | SEIR2, SEIR2psi                             |
| $H_{E1}(0), H_{I21}(0), H_{E21}(0)$                   | Initial number of exposed individuals     | $H_{I1}(0)$                      | assumed   | SEIR2, SEIR2psi                             |
| $H_{E2}(0), H_{I12}(0), H_{E12}(0)$                   | Initial number of exposed individuals     | $H_{I2}(0)$                      | assumed   | SEIR2, SEIR2psi                             |
| <b>Observation process</b>                            |                                           |                                  |           |                                             |
| $r_N$                                                 | observation rate for NDSS data            | Uniform[0, 1]                    | assumed   | All                                         |
| $r_D$                                                 | observation rate for DENFREE data         | fixed                            | assumed   | All                                         |
| $\rho_A$                                              | Proportion of asymptomatic cases          | Uniform[0, 1]                    | assumed   | All                                         |
| $\rho_H$                                              | Proportion of hospitalized cases          | Uniform[0, 1]                    | assumed   | All                                         |
| <b>Seasonality parameters</b>                         |                                           |                                  |           |                                             |
| $b$                                                   | amplitude of the sinusoidal forcing       | Uniform[0, 1]                    | assumed   | All                                         |
| $p$                                                   | phase of the sinusoidal forcing           | Uniform[-0.5, 0.5]               | assumed   | All                                         |
| $i$                                                   | import parameter                          | Uniform[0, 10]                   | assumed   | All                                         |
| <b>Total population</b>                               |                                           |                                  |           |                                             |
| N                                                     | total population                          | 161391                           |           | All                                         |

Table 3 – **Prior distributions of parameters.** "Uniform[0,20]" indicates a uniform distribution in the range [0,20]. "Normal(4.5,0.1) in [4,5]" indicates a normal distribution with mean 4.5 and standard deviation 0.1, restricted to the range [4,5].

202 Dirac priors based on the literature were used for the durations of infectiousness and  
203 incubation, as well as the mortality rates. In models without vectorial transmission, the  
204 incubation period is assumed to be the sum of the extrinsic (in mosquito) and intrinsic (in  
205 human) incubation periods, to reflect the generation time of the disease. For transmission  
206 parameters, we used wide weakly informative priors.

### 207 **2.3.1 Initial conditions**

208 The initial number of infected individuals is assumed to be equal to the number of exposed  
209 individuals and to be lower than 100, as the model starts in January, during the epidemic  
210 trough. Except for the initial proportion of susceptibles, all priors on initial conditions are  
211 uniform distributions.

212

213 The initial proportion of susceptibles is an influential parameter on the model outputs. It is  
214 highly correlated to the transmission parameter  $\beta$  (and therefore to the basic reproductive  
215 number), which makes it difficult to estimate them both. An informative gaussian prior  
216 was therefore used on  $H_S(0)$ . To date, no large scale seroprevalence study is available  
217 for Cambodia, and we relied on a study conducted among schoolchildren in rural Vietnam  
218 [40], which we considered as the closest setting to be compared with Kampong Cham. We  
219 extrapolated their results on schoolchildren (7 to 14 years old) to a 1-15 years old population  
220 as follows, where  $S_\lambda$  is the proportion of susceptibles among 1-15 year-old children (using  
221 their estimation  $\lambda = 0.117$ ):

$$S_\lambda = \frac{1}{15} \sum_{a=1}^{15} \exp(-\lambda a) = 0.44$$

222  $S_\lambda$  is used as the mean of the gaussian prior, and the standard deviation is fixed at 0.05.

223 **2.3.2 Observation rate**

224 Using information on the sampling scheme, we calculate an observation rate on DENFREE  
 225 data (cf. Table 4). We assume that index cases are all reported and that the observation rate  
 226 for community cases equals the ratio of people tested over the population of the area. We  
 227 then extrapolate this observation rate to the total population of the four districts.

| Children < 15 years old                                                         | 2012          |               | 2013          |               |
|---------------------------------------------------------------------------------|---------------|---------------|---------------|---------------|
|                                                                                 | Symptomatic   | Asymptomatic  | Symptomatic   | Asymptomatic  |
| Population in investigated villages (n)                                         | 65,208        |               | 65,208        |               |
| Population in the 4 districts (N)                                               | 161,391       |               | 161,391       |               |
| Index cases (a)                                                                 | 151           | 0             | 376           | 0             |
| Observation rate for index cases                                                | 1             | .             | 1             | .             |
| Children tested in communities (b)                                              | 1722          |               | 4119          |               |
| DENV positive in communities (c)                                                | 85            | 5             | 198           | 28            |
| Observation rate for community cases (d=b/n)                                    | 0.0264        |               | 0.0632        |               |
| Extrapolated number of community cases (e=c/d)                                  | 3219          | 189           | 3135          | 443           |
| Extrapolated total number of cases (f=a+e)                                      | 3370          | 189           | 3511          | 443           |
| Observed total number of cases (g=a+c)                                          | 236           | 5             | 574           | 28            |
| <b>Observation rate (<math>r_s=(g/f)*(n/N)</math> and <math>r_a=b/N</math>)</b> | <b>0.0283</b> | <b>0.0107</b> | <b>0.0661</b> | <b>0.0255</b> |

Table 4 – **Calculation of the observation rate for DENFREE data.** These calculations include all cases under 15 years old in the DENFREE study (18th Jun - 24th Dec 2012 and 3rd Jun - 23rd Sep 2013).

228 Different observation rates are used in the SEIAR model. For DENFREE cases, the  
 229 observation rate is assumed known and relies on the fact that the entire population was not  
 230 tested during the study. For NDSS data, the observation rate is interpreted as the proportion  
 231 of hospitalized cases (which assumes that all hospitalized cases go through surveillance and  
 232 neglects the presence of private hospitals or non reports from hospitals).

## 2.4 Estimation

Models are performed in deterministic framework and estimations are made using random walk Metropolis Hastings. SSM software [41] is used for simulations and calculations. The observation model is negative binomial with the dispersion parameter fixed at 0.1 [42]. In order to initialize the starting point of MCMC chains, we ran a simplex algorithm on 10,000 parameter sets sampled with latin hypercube sampling (with *lhs* R package [43]) and chose the one with the highest posterior value at the end of the chain. The posterior is highly multimodal and thanks to this initialization, the MCMC chain explored the region of the highest mode. The covariance matrix of the proposal distribution was initialized using adaptative MCMC as in Dureau et al. [41].

## 2.5 Model comparison

### 2.5.1 Statistical indicators

In order to identify the best model, the Deviance Information Criterion (DIC) [44] is used. DIC is an indicator that combines a measure of model fit and a penalty on model complexity, commonly used with MCMC estimations. The best model is the one with the smallest DIC. As it does not enable comparison of models with differing number of observations, we also calculate mean RMSE (root mean square error) between observations and simulations of the model with parameters sampled in the posterior distribution (with observation indices from  $t_0$  to  $T$ , and  $N$  simulated trajectories):

$$\text{mean RMSE} = \frac{1}{N} \sum_{i=1}^N \text{RMSE}_i = \frac{1}{N} \sum_{i=1}^N \sqrt{\frac{1}{T - t_0} \sum_{t=t_0}^T (y_{i,t} - y_t^{obs})^2}$$

We first calculated this indicator on the data used for estimation (separating NDSS data and DENFREE data). Then we used it to assess the predictive performance of the model, comparing projections of the model with NDSS observations for 2014 and 2015.

255 **2.5.2 Epidemiological indicators**

256 Models are also compared according to several indicators to describe their epidemiological  
 257 behaviour. The basic reproduction number, the observation rate and the initial proportion  
 258 of susceptibles are estimated using the MCMC chain. In the model with asymptomatic  
 259 infections we report the estimated proportions of asymptomatic and hospitalized cases.  
 260 With parameters sampled in the posterior distribution, we can also re-simulate the model to  
 261 study hidden states, such as the susceptible and infected classes. The effective reproduction  
 262 number ( $R_e$ ) is calculated as the seasonal basic reproduction number multiplied by the  
 263 proportion of susceptibles at each time step, as indicated in Table 5. We then calculate the  
 264 annual incidence proportion as the total number of infections over one year divided by the  
 265 total population of susceptibles at the beginning of the year. In models with two strains, we  
 266 separate the annual incidence of primary infection (as the total number of primary infections  
 267 over one year divided by the total population of naive individuals at the beginning of the  
 268 year) and secondary infection (as the total number of secondary infections over one year  
 269 divided by the total population of susceptibles to one strain only at the beginning of the year).

270

|                                  | SEIR, Laneri, SEIAR                                   | Pandey                                                                              | SEIR2                                                 | SEIR2psi                                                                                              |
|----------------------------------|-------------------------------------------------------|-------------------------------------------------------------------------------------|-------------------------------------------------------|-------------------------------------------------------------------------------------------------------|
| $R_0(t)$                         | $\frac{\beta(t)\sigma}{(\gamma+\mu_H)(\sigma+\mu_H)}$ | $\frac{\beta_H\beta_V(t)\sigma\tau}{(\gamma+\mu_H)(\sigma+\mu_H)\mu_V(\mu_V+\tau)}$ | $\frac{\beta(t)\sigma}{(\gamma+\mu_H)(\sigma+\mu_H)}$ | $\frac{\beta(t)\sigma}{(\gamma+\mu_H)(\sigma+\mu_H)}$                                                 |
| $R_e(t)$ (or $R_e^i, i = 1, 2$ ) | $R_0(t)\frac{H_S(t)}{N}$                              | $R_0(t)\frac{H_S(t)}{N}v_S(t)$                                                      | $R_0(t)\frac{H_S(t)+H_{Sj}(t)}{N}$                    | $R_0(t)\frac{H_S(t)+H_{Sj}(t)}{N}\left[\frac{H_{Ii}(t)+\psi H_{Iji}(t)}{H_{Ii}(t)+H_{Iji}(t)}\right]$ |

Table 5 – Reproduction numbers calculation in each model.

271 Calculations are made using R version 3.2.2 [45], and graphics using *ggplot2* [46].

272 **3 Results**

273 **3.1 Statistical comparison**

| Model                           | SEIR        | Laneri      | Pandey      | SEIAR       | SEIR2       | SEIR2psi    |
|---------------------------------|-------------|-------------|-------------|-------------|-------------|-------------|
| <b>nb parameters</b>            | 7           | 8           | 9           | 8           | 10          | 11          |
| <b>nb observations</b>          | 656         | 656         | 656         | 686         | 686         | 686         |
| <b>ESTIMATION SET</b>           |             |             |             |             |             |             |
| <b>DIC</b>                      | 4774        | 4818        | 4778        | 4990        | 4800        | <b>4604</b> |
| <b>mean RMSE NDSS</b>           | 23.6        | 23.8        | 23.8        | 24.6        | 18.8        | <b>16.8</b> |
| <i>mean RMSE NDSS 2002</i>      | <i>52.2</i> | <i>51.4</i> | <i>52.6</i> | <i>55.9</i> | <i>14.4</i> | <i>15.1</i> |
| <i>mean RMSE NDSS 2003-2013</i> | <i>19.0</i> | <i>19.4</i> | <i>19.2</i> | <i>19.4</i> | <i>19.1</i> | <i>17.0</i> |
| <b>mean RMSE DENFREE</b>        | 23.7        | 23.8        | 23.0        | 24.3        | <b>20.3</b> | 20.7        |
| <b>TEST SET</b>                 |             |             |             |             |             |             |
| <b>mean RMSE 2014-2015</b>      | 14.7        | 14.7        | 15.3        | 15.4        | 21.3        | <b>9.8</b>  |
| <i>mean RMSE 2014</i>           | <i>18.5</i> | <i>18.5</i> | <i>18.9</i> | <i>19.5</i> | <i>25.8</i> | <i>11.4</i> |
| <i>mean RMSE 2015</i>           | <i>9.6</i>  | <i>9.1</i>  | <i>10.2</i> | <i>9.6</i>  | <i>15.4</i> | <i>7.7</i>  |

Table 6 – **Information criteria in deterministic model.** DIC is the Deviance Information Criterion [44]. RMSE is the root mean square error between simulations and observations: it is calculated separately on the datasets used for estimations (NDSS data for 2002-2013 and DENFREE data for 2012-2013) and on the test set (NDSS data for 2014-2015). It is also computed on separated years in order to highlight well or badly estimated years: for example, for each simulation  $i$ ,  $\frac{1}{12}(\text{RMSE}_i^{\text{NDSS } 2002})^2 + \frac{11}{12}(\text{RMSE}_i^{\text{NDSS } 2003-2013})^2 = (\text{RMSE}_i^{\text{NDSS}})^2$ . Convergence diagnosis are displayed in Appendix (trace plots et correlation plots respectively in Figures 12 and 13).

274 For single strain models, the SEIR and Pandey models proved the best with the DIC criterion  
 275 (cf. Table 6). For two strain models, the SEIR2psi proved best. As regards simulation-based

276 indicators on the 2002-2014 data, SEIR, Laneri and Pandey models have RMSE values in  
277 the same order of magnitude. Indeed, they produce a similar dynamic with respect to the  
278 2002-2014 data (cf. Figures 7-8), with a period of approximately six years, and a large  
279 overestimation of the 2002 outbreak (the RMSE for 2002 is far higher ( $> 50$ ) than the  
280 average for the other years ( $< 20$ )). Due to the small number of observed asymptomatic  
281 cases, SEIAR model also produces a similar dynamic. Models with two strains outperform  
282 all the other models in terms of RMSE, but the difference is mainly explained by the first  
283 year of simulation (2002). When visualizing the simulations compared to the data (cf.  
284 Figures 7-8), all models underestimate a large number of epidemic peaks and all models  
285 but the ones with two strains overpredict the first epidemic peak (as pointed out in Table 6).  
286 SEIR2psi is the model in which the large epidemic in 2007 is best reproduced and overall,  
287 SEIR2psi is the model that reproduces most accurately the observed data.

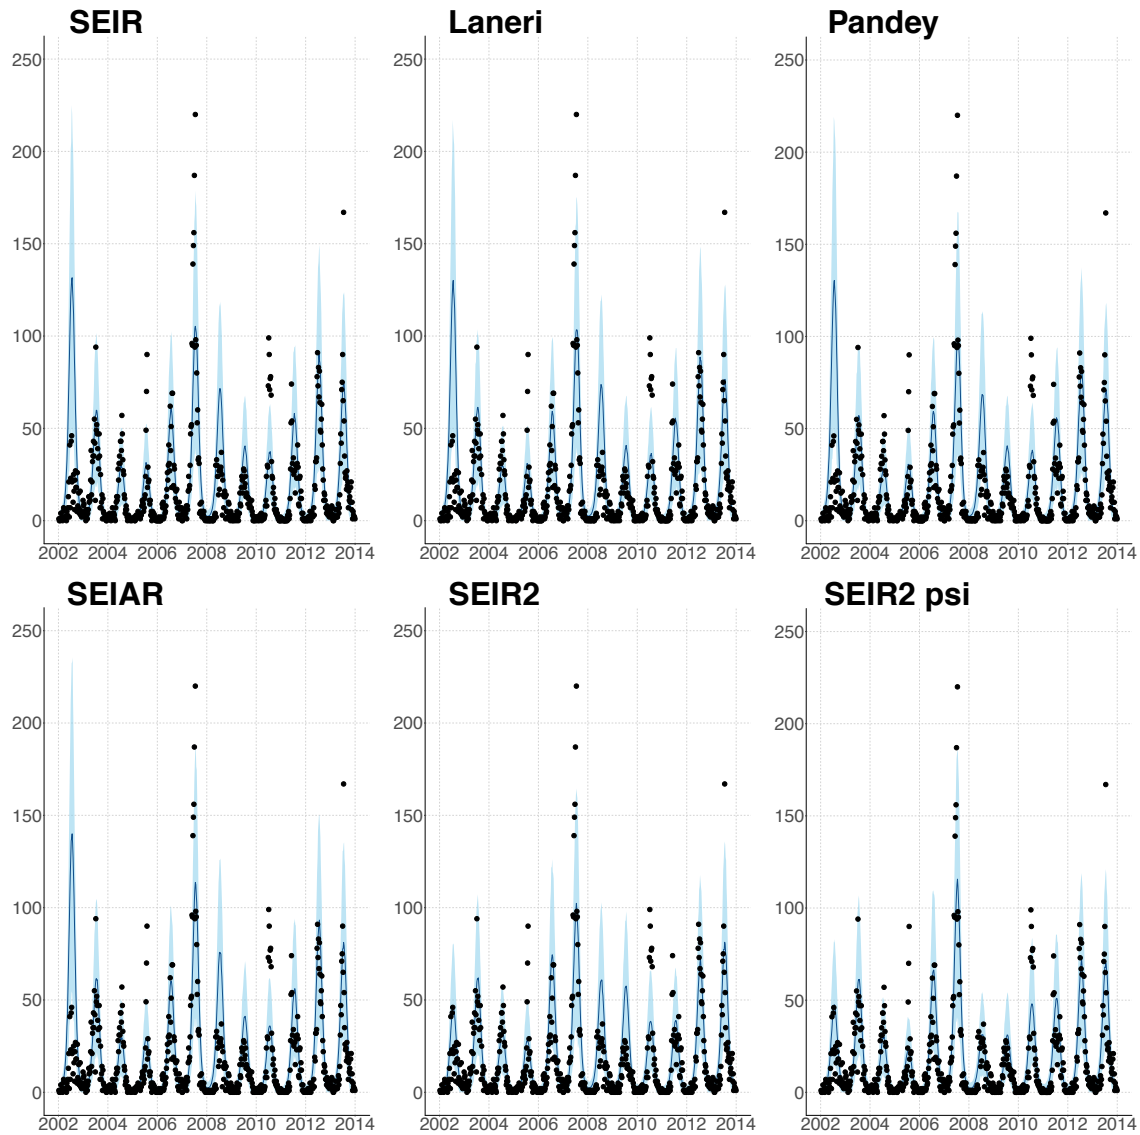

Figure 7 – Number of observed cases per week and NDSS data, 2002-2013. Simulations with negative binomial noise using parameters from the posterior distribution (SEIR/Laneri/Pandey/SEIR2/SEIR2psi: observed NDSS cases, SEIAR: hospitalized cases). Posterior median (solid line), 95% credible intervals (shaded blue area) and NDSS data points (black dots).



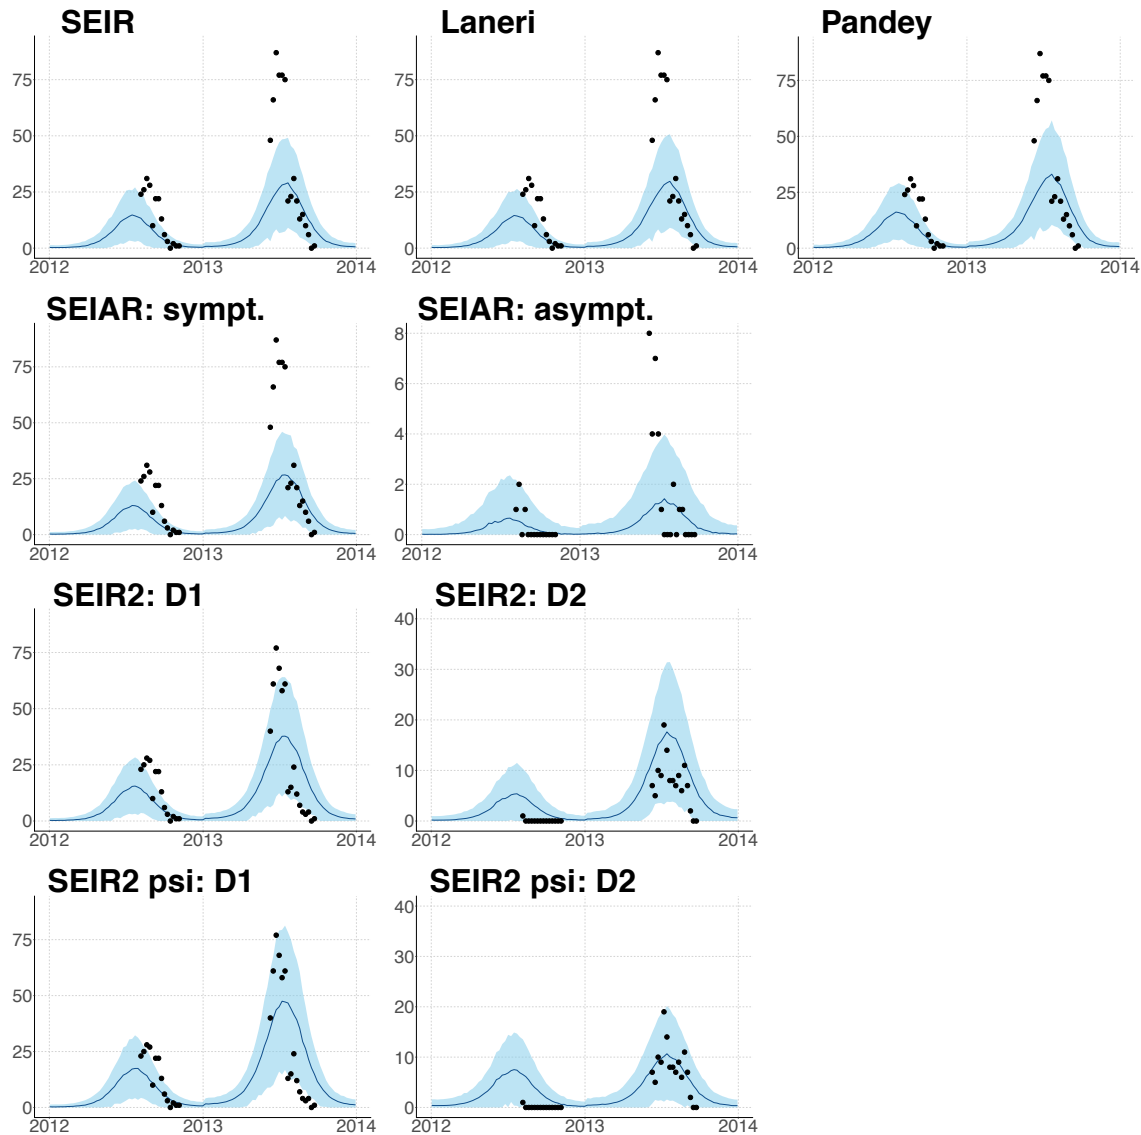

Figure 8 – Number of observed cases per week and DENFREE data, 2012-2013. Simulations with negative binomial noise using parameters from the posterior distribution. Posterior median (solid line), 95% credible intervals (shaded blue area) and DENFREE data points (black dots).

288 Considering the predictive capacity of the models, only SEIR2psi model predicts a smaller  
289 epidemic in 2014, as was observed in the data (cf. Figure 9). Across the other models,  
290 the predictions for 2014-2015 are qualitatively similar: they largely overestimate the 2014  
291 epidemic, and to a lesser extent the one in 2015.

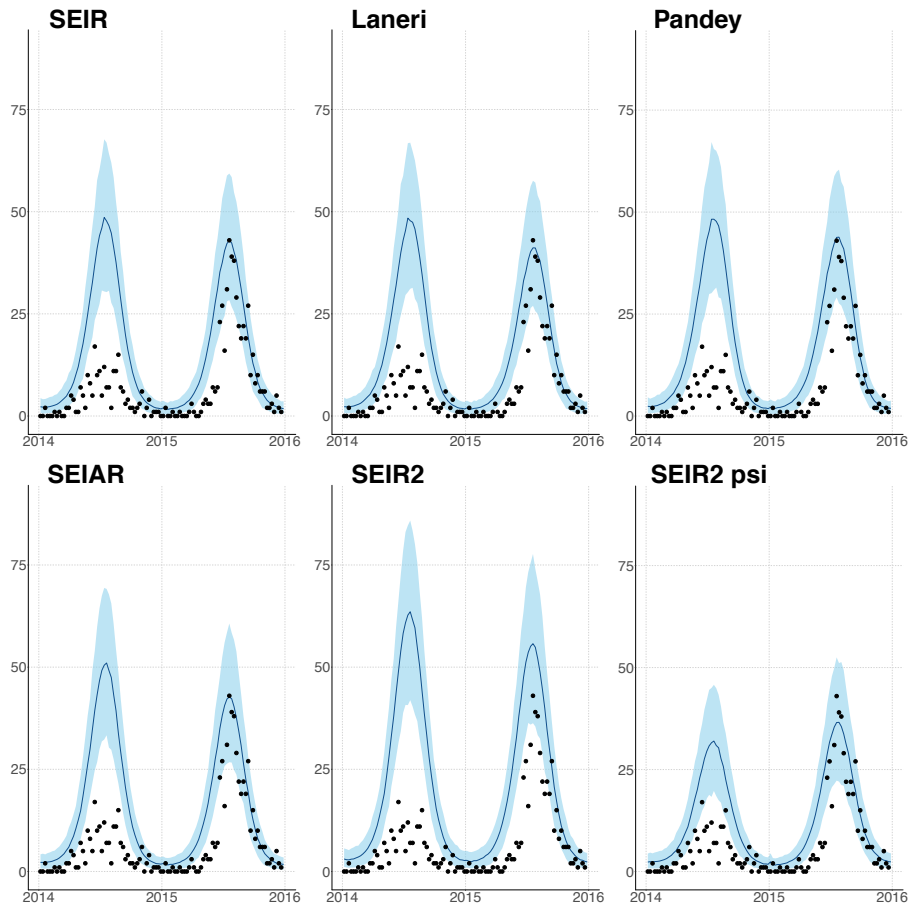

**Figure 9 – Projections of the number of observed cases per week and NDSS data, 2014-2015.** Simulations with negative binomial noise using parameters from the posterior distribution (SEIR/Laneri/Pandey/SEIR2/SEIR2psi: observed NDSS cases, SEIAR: hospitalized cases). Posterior median (solid line), 95% credible intervals (shaded blue area) and NDSS data points (black dots).

292 **3.2 Epidemiological comparison**

| Model                                     |                              | SEIR             | Laneri           | Pandey           | SEIAR            | SEIR2            | SEIR2psi         |
|-------------------------------------------|------------------------------|------------------|------------------|------------------|------------------|------------------|------------------|
| mean $R_0$                                | median (95%CI)               | 2.31 (2.27-2.36) | 2.38 (2.33-2.42) | 3.35 (3.27-3.43) | 2.30 (2.26-2.34) | 2.06 (2.02-2.11) | 2.53 (2.47-2.60) |
| max $R_0$                                 | median (95%CI)               | 3.72 (3.64-3.81) | 3.75 (3.67-3.83) | 6.01 (5.90-6.24) | 3.72 (3.64-3.80) | 3.24 (3.17-3.32) | 3.93 (3.83-4.03) |
| $\psi$                                    | median (95%CI)               | .                | .                | .                | .                | .                | 0.69 (0.66-0.73) |
| $H_S(0)/N$ (%)                            | median (95%CI)               | 47 (46-47)       | 47 (46-48)       | 37 (36-37)       | 47 (47-48)       | 33 (29-35)       | 27 (24-29)       |
| $H_{S1}(0)/N$ (%)                         | median (95%CI)               | .                | .                | .                | .                | 20 (18-27)       | 22 (20-24)       |
| $H_{S2}(0)/N$ (%)                         | median (95%CI)               | .                | .                | .                | .                | 11 (10-18)       | 12 (10-15)       |
| Observation rate (%)                      | median (95%CI)               | 17 (16-18)       | 17 (17-18)       | 14 (14-15)       | .                | 10 (9-10)        | 8 (8-8)          |
| Hospitalized (%)                          | median (95%CI)               | .                | .                | .                | 20 (19-21)       | .                | .                |
| Asymptomatic (%)                          | median (95%CI)               | .                | .                | .                | 12 (10-14)       | .                | .                |
| <b>Median annual incidence proportion</b> |                              |                  |                  |                  |                  |                  |                  |
| primary infections (%)                    | median 2002-2015 (min - max) | 8 (4-16)         | 7 (4-16)         | 12 (7-25)        | 7 (4-17)         | 13 (7-21)        | 14 (8-31)        |
| secondary infections (%)                  | median 2002-2015 (min - max) | .                | .                | .                | .                | 7 (3-11)         | 7 (3-17)         |
| mean $R_e$                                | median (95%CI)               | 1.03 (1.03-1.04) | 1.08 (1.07-1.08) | 1.16 (1.15-1.17) | 1.04 (1.03-1.04) | .                | .                |
| mean $R_e$ strain 1                       | median (95%CI)               | .                | .                | .                | .                | 1.03 (1.02-1.03) | 1.03 (1.02-1.03) |
| mean $R_e$ strain 2                       | median (95%CI)               | .                | .                | .                | .                | 1.03 (1.03-1.03) | 1.03 (1.02-1.03) |
| max $R_e$                                 | median (95%CI)               | 1.76 (1.73-1.79) | 1.79 (1.76-1.82) | 2.27 (2.22-2.34) | 1.77 (1.75-1.80) | .                | .                |
| max $R_e$ strain 1                        | median (95%CI)               | .                | .                | .                | .                | 1.78 (1.76-1.81) | 1.80 (1.77-1.82) |
| max $R_e$ strain 2                        | median (95%CI)               | .                | .                | .                | .                | 1.73 (1.70-1.75) | 1.71 (1.68-1.74) |

Table 7 – **Epidemiological criteria among children under 15 years old.** Estimated parameters from the posterior distribution and indicators based on simulations over 2002-2015.

293 The average  $R_0$  is estimated to be between 2 and 3 in most of the models and the maximum  
 294 value between 3 and 4 (cf. Table 7), except with the Pandey model, in which it is higher  
 295 (mean value above 3 and maximum value above 6.0). The estimated values are very close in  
 296 the SEIR, Laneri and SEIAR models. The estimates are on the lower side of those estimates  
 297 for South East Asia in general [47, 48, 49]. In particular, our estimates are close to the  
 298 estimates for  $R_0$  in Cambodia made from age-stratified case-notification data [49], as far as  
 299 the estimates based on different data types and models are comparable. Nevertheless, our  
 300 estimation of  $R_0$  strongly depends on the estimation of the initial proportion of susceptibles  
 301 ( $H_S(0)$ ), which is unknown in the case of Cambodia and can bias the estimates. The  
 302 effective reproductive numbers ( $R_e$ ) have a mean value around 1 and a maximum value

303 around 1.8 in most models, but it is higher in the Pandey model.

304 In SEIR2psi model, the parameter  $\psi$  quantifying the interaction between strains is inferior  
305 to 1, suggesting a reduced infectivity of secondary infections on average, as in Aguiar et  
306 al. [36], or in Coudeville and Garnett [50]. This suggests that at the population level  
307 cross-protection is more important than cross-enhancement to explain the results observed  
308 in the field.

309

310

311 It is estimated in the models that approximately half of the children are susceptible to  
312 the disease, which is close to the informative prior used. This proportion is lower in the  
313 Pandey model. In the models with two strains, the number of susceptibles to both strains  
314 is smaller, but as a whole, less children are immune to the disease, since more than 30%  
315 have experienced only one infection. The proportion of children who are susceptible to one  
316 or both strains are however correlated in the MCMC chain (cf. Figure 13 in Appendix),  
317 indicating that their relative shares are not well identified. These values are in the range  
318 of the measures of seroprevalence in several Asian countries [51]. As the measures reveal  
319 large differences between countries [51, 40, 52, 53], a seroprevalence survey in Cambodia  
320 would be particularly useful to evaluate which scenario is more plausible.

321

322 The observation rate for NDSS data varies between models, from 14 to 21% in models with  
323 one strain and between 6 and 13% in the two strain models. These values indicate that a  
324 large proportion of dengue cases are not reported in national surveillance, likely reflecting  
325 mild symptoms that do not require hospitalization or misdiagnosis or misreporting.

326

327 In the SEIR2psi model, we also plotted the current number of infected individuals for each  
328 strain (cf. Figure 10). In our simulations, the first strain is responsible for large explosive  
329 outbreaks, whereas the second one has a more regular pattern over the years. Moreover,

330 the two strains are asynchronous and each one dominates for two or three years. It is also  
331 qualitatively close to the dynamics observed in Thailand [13] or Singapore [54].  
332 The proportion of susceptible individuals also displays asynchronous dynamics between  
333 strains, as they reflect the history of past epidemics. Despite the seasonality and the  
334 year-to-year variations, the total number of susceptibles remains high (cf. Figure 10 for  
335 SEIR2psi and SEIR models), allowing the possibility for large outbreaks to occur in the  
336 future.

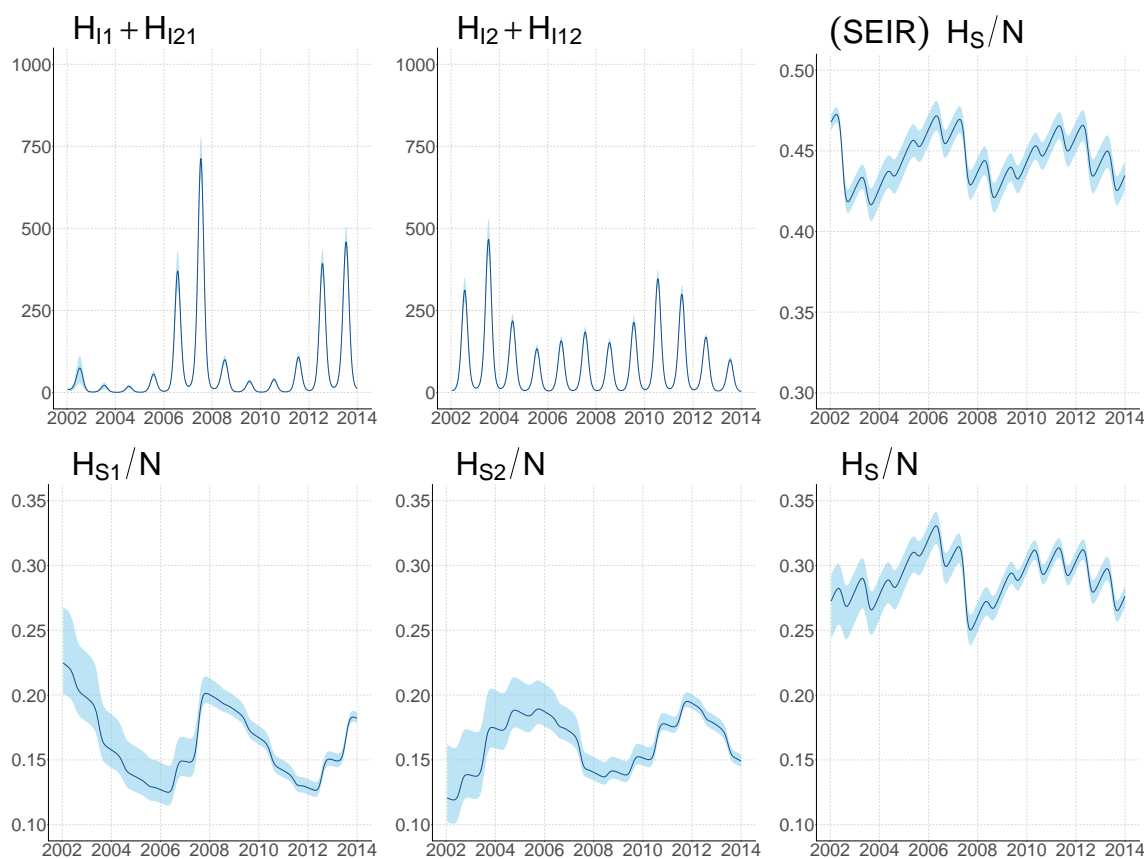

**Figure 10 – Current number of infected and proportion of susceptible individuals per serotype in SEIR2psi model.** Median of the simulations and confidence intervals without observation error. For comparison, the proportion of susceptibles in SEIR model is also displayed.

337 We calculated the annual incidence proportion as the proportion of new infections over one  
338 year among the susceptibles at the beginning of that year (cf. Figure 11). The values for  
339 primary infections are coherent with other studies in Vietnam or Indonesia who analyzed

340 seroprevalence data or seroconversion data [40, 55, 56, 57, 52]. The incidence proportion  
341 is highly variable from one year to the next, especially in models with two strains.

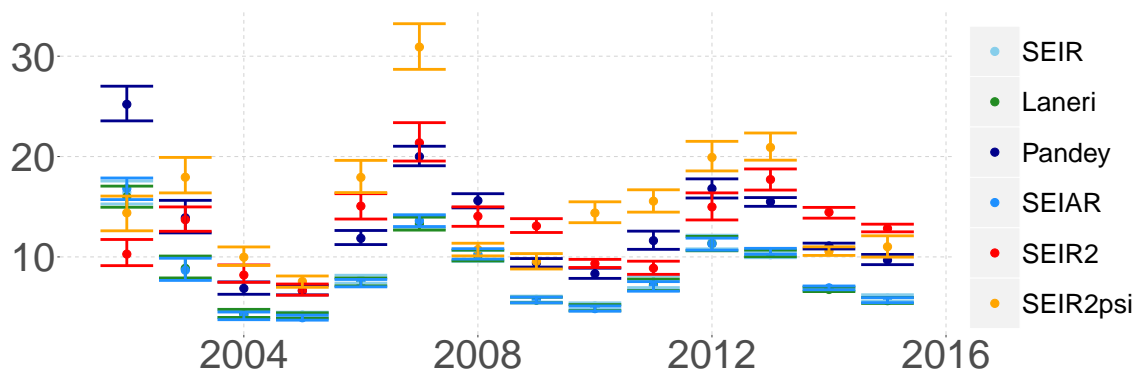

Figure 11 – **Annual incidence proportion of first dengue infection (%)**. Median and confidence intervals per year, based on simulations over 2002-2015.

## 342 4 Discussion

343 With two datasets reporting dengue cases in the Kampong Cham region in Cambodia, we  
344 compared several models to represent dengue transmission dynamics in a rural setting.  
345 In order to assess the quality of the models, we compared their statistical properties and  
346 their epidemiological features. In particular, in our models, the proportion of susceptibles  
347 displays year-to-year variations but remains high over the period, so that large outbreaks  
348 may occur in the future. The best model describing the dengue trend over 14 years of  
349 data was the two strain model, with reduced infectivity for secondary infected individuals.  
350 Secondary infections being more prone to severe dengue [7], these individuals may stay  
351 at home or at the hospital, and be less involved in the spread of the disease than the ones  
352 whose mild symptoms do not alter "house-to-house movement" [58, 59]. This feature  
353 was previously analytically studied and coherent with dengue incidence time series in  
354 Thailand [36, 60]. On the contrary, including vectorial transmission or a compartment  
355 for asymptomatic infections did not seem to improve the model fit despite the additional  
356 complexity. The non-utility of including vectorial components has been observed by several

357 authors previously [29, 61, 62]. Mathematical analyses have suggested that because the time  
358 scale of the mosquito epidemiology is so fast compared to that in humans, it will be slaved  
359 by the slower human epidemiology. Thus, for understanding human disease epidemiology,  
360 mainly the dynamics of the human time scale are essential and inclusion of mosquito  
361 dynamics results in an unnecessary increase in model complexity when vector data is not  
362 available [63, 61, 62]. The main effect of mosquito dynamics is captured in our model by  
363 the seasonal forcing. The lack of additional improvement when including the asymptomatic  
364 class is likely due to the very few asymptomatic infections observed, which may be due  
365 to a very strict definition of asymptomatic infections. Yoon et al. [59] also observe many  
366 inapparent cases in their cohort but few strictly asymptomatic cases in their cluster study in  
367 Thailand. Therefore, in our model, including a compartment for asymptomatic individuals  
368 had only little influence on the overall transmission due to their small number.

369  
370 We also obtained some insight on the parameters describing transmission. The average  
371 annual  $R_0$  is estimated between 2.1 and 2.6 in most models. These values are within the  
372 range observed in urban settings, suggesting that, despite very different population densities,  
373 the rural dynamics of dengue are not that dissimilar, or that dissimilarities are hidden by  
374 the variations between countries and the uncertainties due to diverse estimation procedures.  
375 The median annual incidence at primary infection over the period is between 8 and 14, with  
376 large year-to-year variations. The estimated observation rate on surveillance data varies  
377 between models, (14-21% in models with one strain and 6-13% in two strain models),  
378 indicating in both cases a high proportion of unreported infections. These values are in line  
379 with the large underrecognition highlighted in Wichmann et al. [64], and also with other  
380 studies in South-East Asia [59, 55, 57].

381  
382 This work has however several limitations. Firstly, model comparison was not straightforward  
383 between one strain and two strain models, both statistically and epidemiologically. From the

384 statistical point of view, the differing number of observations between models led us to use  
385 simulation based-indicators. From the epidemiological point of view, single strain models,  
386 two strain models and observations on four serotypes may be hard to compare because some  
387 indicators cover different interpretations. For example, in single strain models, there is no  
388 distinction in the susceptible class between individuals immune to one strain only and naive  
389 ones, and there is no strain specific  $R_0$  or incidence.

390 Secondly, the selected model formulations were restricted due to data availability. In  
391 particular, despite the endemicity of the four serotypes in rural Cambodia, we did not  
392 consider more than two dengue serotypes. This was done to limit model complexity,  
393 especially in the number of unknown initial conditions, but has also been previously shown  
394 to adequately describe dengue dynamics [39]. When two serotypes were considered, we  
395 tested only interactions in terms of enhancement or restriction of infectiousness. We did  
396 not include models with (temporary) cross immunity, because of the too large increase in  
397 the number of parameters with respect to the data. We also did not include models with a  
398 finer spatial scale, even if small scale transmission plays a decisive role in dengue dynamics  
399 [12, 65]. On the one hand, NDSS data were only available at the district level, which was too  
400 large to follow transmission chains and too small for observing a sufficient number of cases.  
401 On the other hand, the clustered sampling protocol in the DENFREE study abnegated the  
402 interpretation of the spatial distribution of community cases. We also restricted the analysis  
403 to children under 15 years old and did not study the role of adults in transmission.

404 Thirdly, the projections are not completely able to describe the observed data, as most  
405 models overestimate the dengue epidemic in 2014. Nevertheless, 2014 was a particular  
406 year, with the lowest number of cases in the whole time series, maybe due to particular  
407 climatic conditions. In many countries in South-East Asia, except Malaysia, the reported  
408 incidence was lower than in 2013 [66]. Many provinces of Thailand also reported fewer  
409 cases than usual in 2014 [67]. Our models are deterministic and do not take into account  
410 variations due to demographic stochasticity or environmental hazards such as climate.



411 Despite these limitations, combining two datasets permitted us to overcome some observation  
412 biases, such the fact that surveillance data did not report serotype and DENFREE data did  
413 not reflect the long term dynamics. Nevertheless, some information is lacking in both  
414 datasets, in particular that on seroprevalence. Clearly the parameter estimations depend  
415 on the immunological status at the beginning of the simulations. As in our previous  
416 work [34], our modeling study stresses the importance of seroprevalence data in order to  
417 more accurately estimate the initial conditions of our simulation and reduce identifiability  
418 problems. A seroprevalence survey in Cambodia would be of great value to evaluate the  
419 dengue burden, transmissibility potential and consider vaccination scenarios.

420

421 In conclusion, our analyses highlight the importance of using two-strain models with  
422 interacting effects and the lack of added value of incorporating vector and asymptomatic  
423 components. Although model complexity is framed by the scientific objectives, it must  
424 also be driven by the available data. The unavailability of mosquito data and the very low  
425 incidence of asymptomatic infections questions their incorporation explicitly in the models.  
426 Another important aspect is related to choosing the best model considering the available  
427 data. In quantitative epidemiology, in recent years, it has been standard to use statistical  
428 indices computed on estimated likelihood [29, 28]. In this work, we discussed not only  
429 the goodness of fit of the models, but also their prediction capacity and epidemiological  
430 features. The sole use of statistical indices is not enough and it is crucial to take into account  
431 some epidemiological features (such as  $R_0$ , annual incidence, dynamics of the susceptible  
432 class) of the disease studied into account.

## 433 **Acknowledgments**

434 All the authors have been supported by a grant from Agence Nationale de la Recherche for  
435 the PANIC project (Targeting PATHogen's NICHes: a new approach for infectious diseases

*REFERENCES*

*REFERENCES*

436 control in low-income countries: ANR-14-CE02-0015-01). The research leading to these  
437 results has also received funding from the European Commission Seventh Framework  
438 Program FP7 for the DENFREE project under Grant Agreement 282 378. CC and BC  
439 are partially supported by the "Pépinierie interdisciplinaire Eco-Evo-Devo" from the Centre  
440 National de la Recherche Scientifique (CNRS). CC is supported by the PhD studentship of  
441 the Groupe des Ecoles Nationales d'Economie et Statistique (GENES). The funders played  
442 no role in the study design, data collection, analysis, or preparation of the manuscript.

443 **References**

- 444 [1] Grange L, Simon-Loriere E, Sakuntabhai A, Gresh L, Paul R, Harris E.  
445 Epidemiological Risk Factors Associated with High Global Frequency of Inapparent  
446 Dengue Virus Infections. *Frontiers in Immunology*. 2014 Jun;5:280. Available from:  
447 <http://www.ncbi.nlm.nih.gov/pmc/articles/PMC4052743/>.
- 448 [2] Guzman MG, Halstead SB, Artsob H, Buchy P, Farrar J, Gubler DJ, et al. Dengue: a  
449 continuing global threat. *Nature Reviews Microbiology*. 2010 Dec;8:S7–16.
- 450 [3] World Health Organisation. Dengue;. Accessed: 2017-07-20. Available from: <http://www.who.int/topics/dengue/en/>.
- 451
- 452 [4] Messina JP, Brady OJ, Scott TW, Zou C, Pigott DM, Duda KA, et al. Global spread  
453 of dengue virus types: mapping the 70 year history. *Trends in Microbiology*. 2014  
454 Mar;22(3):138–146.
- 455 [5] Bhatt S, Gething PW, Brady OJ, Messina JP, Farlow AW, Moyes CL, et al. The global  
456 distribution and burden of dengue. *Nature*. 2013;496(7446):504–507. Available from:  
457 <http://www.nature.com/nature/journal/v496/n7446/full/nature12060.html>.

REFERENCES

REFERENCES

- 458 [6] Shepard DS, Undurraga EA, Halasa YA, Stanaway JD. The global economic  
459 burden of dengue: a systematic analysis. *The Lancet Infectious Diseases*. 2016  
460 Aug;16(8):935–941.
- 461 [7] Halstead SB. Dengue. *The Lancet*. 2007 Nov;370(9599):1644–1652. Available from:  
462 <http://www.sciencedirect.com/science/article/pii/S0140673607616870>.
- 463 [8] Messina JP, Brady OJ, Pigott DM, Golding N, Kraemer MUG, Scott TW, et al.  
464 The many projected futures of dengue. *Nature Reviews Microbiology*. 2015  
465 Apr;13(4):230–239.
- 466 [9] Sharp TM, Tomashek KM, Read JS, Margolis HS, Waterman SH. A New Look at  
467 an Old Disease: Recent Insights into the Global Epidemiology of Dengue. *Current*  
468 *Epidemiology Reports*. 2017;4(1):11–21.
- 469 [10] Reiner RC, Perkins TA, Barker CM, Niu T, Chaves LF, Ellis AM, et al. A systematic  
470 review of mathematical models of mosquito-borne pathogen transmission: 1970-2010.  
471 *Journal of The Royal Society Interface*. 2013 Feb;10(81):20120921–20120921.  
472 Available from: <http://rsif.royalsocietypublishing.org/cgi/doi/10.1098/rsif.2012.0921>.
- 473 [11] Heesterbeek H, Anderson RM, Andreasen V, Bansal S, De Angelis D, Dye C,  
474 et al. Modeling infectious disease dynamics in the complex landscape of global  
475 health. *Science*. 2015 Mar;347(6227):aaa4339–aaa4339. Available from: <http://www.sciencemag.org/cgi/doi/10.1126/science.aaa4339>.
- 477 [12] Salje H, Lessler J, Endy TP, Curriero FC, Gibbons RV, Nisalak A, et al. Revealing  
478 the microscale spatial signature of dengue transmission and immunity in an urban  
479 population. *Proceedings of the National Academy of Sciences of the United States of*  
480 *America*. 2012 Jun;109(24):9535–9538.
- 481 [13] Reich NG, Shrestha S, King AA, Rohani P, Lessler J, Kalayanarooj S, et al. Interactions  
482 between serotypes of dengue highlight epidemiological impact of cross-immunity.

*REFERENCES*

*REFERENCES*

- 483 Journal of The Royal Society Interface. 2013 Jul;10(86):20130414–20130414.  
484 Available from: <http://rsif.royalsocietypublishing.org/cgi/doi/10.1098/rsif.2013.0414>.
- 485 [14] Clapham H, Cummings DAT, Nisalak A, Kalayanaroj S, Thaisomboonsuk  
486 B, Klungthong C, et al. Epidemiology of Infant Dengue Cases Illuminates  
487 Serotype-Specificity in the Interaction between Immunity and Disease, and  
488 Changes in Transmission Dynamics. PLOS Neglected Tropical Diseases. 2015  
489 Dec;9(12):e0004262. Available from: <http://dx.plos.org/10.1371/journal.pntd.0004262>.
- 490 [15] Nisalak A, Clapham HE, Kalayanaroj S, Klungthong C, Thaisomboonsuk B,  
491 Fernandez S, et al. Forty Years of Dengue Surveillance at a Tertiary Pediatric Hospital  
492 in Bangkok, Thailand, 1973-2012. The American Journal of Tropical Medicine and  
493 Hygiene. 2016 Jun;94(6):1342–1347.
- 494 [16] Strickman D, Sithiprasasna R, Kittayapong P, Innis BL. Distribution of dengue  
495 and Japanese encephalitis among children in rural and suburban Thai villages. The  
496 American Journal of Tropical Medicine and Hygiene. 2000 Aug;63(1-2):27–35.
- 497 [17] Mammen Jr MP, Pimgate C, Koenraadt CJ, Rothman AL, Aldstadt J, Nisalak A, et al.  
498 Spatial and temporal clustering of dengue virus transmission in Thai villages. PLoS  
499 Med. 2008;5(11):e205. Available from: [http://journals.plos.org/plosmedicine/article?id=](http://journals.plos.org/plosmedicine/article?id=10.1371/journal.pmed.0050205)  
500 [10.1371/journal.pmed.0050205](http://journals.plos.org/plosmedicine/article?id=10.1371/journal.pmed.0050205).
- 501 [18] Aldstadt J, Yoon IK, Tannitisupawong D, Jarman RG, Thomas SJ, Gibbons RV, et al.  
502 Space-time analysis of hospitalised dengue patients in rural Thailand reveals important  
503 temporal intervals in the pattern of dengue virus transmission. Tropical medicine &  
504 international health: TM & IH. 2012 Sep;17(9):1076–1085.
- 505 [19] Guha-Sapir D, Schimmer B. Dengue fever: new paradigms for a changing  
506 epidemiology. Emerging Themes in Epidemiology. 2005;2:1. Available from:  
507 <http://dx.doi.org/10.1186/1742-7622-2-1>.

*REFERENCES*

*REFERENCES*

- 508 [20] Muhammad Azami NA, Salleh SA, Neoh Hm, Syed Zakaria SZ, Jamal R. Dengue  
509 epidemic in Malaysia: Not a predominantly urban disease anymore. BMC Research  
510 Notes. 2011;4:216. Available from: <http://dx.doi.org/10.1186/1756-0500-4-216>.
- 511 [21] Chareonsook O, Foy HM, Teeraratkul A, Silarug N. Changing epidemiology  
512 of dengue hemorrhagic fever in Thailand. Epidemiology and Infection. 1999  
513 Feb;122(1):161–166.
- 514 [22] Vong S, Khieu V, Glass O, Ly S, Duong V, Huy R, et al. Dengue Incidence in Urban  
515 and Rural Cambodia: Results from Population-Based Active Fever Surveillance,  
516 2006–2008. PLoS Neglected Tropical Diseases. 2010 Nov;4(11):e903. Available  
517 from: <http://dx.plos.org/10.1371/journal.pntd.0000903>.
- 518 [23] Reller ME, Bodinayake C, Nagahawatte A, Devasiri V, Kodikara-Arachichi W, Strouse  
519 JJ, et al. Unsuspected Dengue and Acute Febrile Illness in Rural and Semi-Urban  
520 Southern Sri Lanka. Emerging Infectious Diseases. 2012 Feb;18(2):256–263.  
521 Available from: <http://www.ncbi.nlm.nih.gov/pmc/articles/PMC3310451/>.
- 522 [24] Teurlai M, Huy R, Cazelles B, Duboz R, Baehr C, Vong S. Can Human Movements  
523 Explain Heterogeneous Propagation of Dengue Fever in Cambodia? PLoS Neglected  
524 Tropical Diseases. 2012 Dec;6(12):e1957. Available from: [http://dx.plos.org/10.1371/  
525 journal.pntd.0001957](http://dx.plos.org/10.1371/journal.pntd.0001957).
- 526 [25] Cuong HQ, Vu NT, Cazelles B, Boni MF, Thai KTD, Rabaa MA, et al. Spatiotemporal  
527 Dynamics of Dengue Epidemics, Southern Vietnam. Emerging Infectious Diseases.  
528 2013 Jun;19(6):945–953. Available from: [http://www.ncbi.nlm.nih.gov/pmc/articles/  
529 PMC3713821/](http://www.ncbi.nlm.nih.gov/pmc/articles/PMC3713821/).
- 530 [26] Cazelles B, Cazelles K. Major urban centers have weak influence on the timing of  
531 dengue epidemics in Southeast Asia. International Journal of Infectious Diseases.

REFERENCES

REFERENCES

- 532 2014 Apr;21, Supplement 1:217. Available from: [http://www.sciencedirect.com/science/](http://www.sciencedirect.com/science/article/pii/S1201971214009321)  
533 [article/pii/S1201971214009321](http://www.sciencedirect.com/science/article/pii/S1201971214009321).
- 534 [27] King AA, Ionides EL, Pascual M, Bouma MJ. Inapparent infections and cholera  
535 dynamics. *Nature*. 2008 Aug;454(7206):877–880. Available from: <http://www.nature.com/doi/10.1038/nature07084>.  
536 [com/doi/10.1038/nature07084](http://www.nature.com/doi/10.1038/nature07084).
- 537 [28] Camacho A, Ballesteros S, Graham AL, Carrat F, Ratmann O, Cazelles B. Explaining  
538 rapid reinfections in multiple-wave influenza outbreaks: Tristan da Cunha 1971  
539 epidemic as a case study. *Proceedings of the Royal Society of London B: Biological*  
540 *Sciences*. 2011 Apr;p. rspb20110300. Available from: <http://rspb.royalsocietypublishing.org/content/early/2011/04/22/rspb.2011.0300>.  
541 [org/content/early/2011/04/22/rspb.2011.0300](http://rspb.royalsocietypublishing.org/content/early/2011/04/22/rspb.2011.0300).
- 542 [29] Pandey A, Mubayi A, Medlock J. Comparing vector–host and SIR models for dengue  
543 transmission. *Mathematical Biosciences*. 2013 Dec;246(2):252–259. Available from:  
544 <http://linkinghub.elsevier.com/retrieve/pii/S0025556413002435>.
- 545 [30] Duong V, Lambrechts L, Paul RE, Ly S, Lay RS, Long KC, et al. Asymptomatic  
546 humans transmit dengue virus to mosquitoes. *Proceedings of the National*  
547 *Academy of Sciences*. 2015 Nov; Available from: [http://www.pnas.org/cgi/doi/10.1073/](http://www.pnas.org/cgi/doi/10.1073/pnas.1508114112)  
548 [pnas.1508114112](http://www.pnas.org/cgi/doi/10.1073/pnas.1508114112).
- 549 [31] Huy R, Buchy P, Conan A, Ngan C, Ong S, Ali R, et al. National dengue surveillance  
550 in Cambodia 1980–2008: epidemiological and virological trends and the impact of  
551 vector control. *Bulletin of the World Health Organization*. 2010 Sep;88(9):650–657.  
552 Available from: <http://www.who.int/bulletin/volumes/88/9/09-073908.pdf>.
- 553 [32] National Institute of Statistics, Ministry of Planning, Phnom Penh, Cambodia. General  
554 Population Census of Cambodia 2008. National report on final census results; 2009.
- 555 [33] Laneri K, Bhadra A, Ionides EL, Bouma M, Dhiman RC, Yadav RS, et al. Forcing  
556 Versus Feedback: Epidemic Malaria and Monsoon Rains in Northwest India. *PLoS*

REFERENCES

REFERENCES

- 557 Computational Biology. 2010 Sep;6(9):e1000898. Available from: <http://dx.plos.org/>  
558 [10.1371/journal.pcbi.1000898](http://dx.plos.org/10.1371/journal.pcbi.1000898).
- 559 [34] Champagne C, Salthouse DG, Paul R, Cao-Lormeau VM, Roche B, Cazelles B.  
560 Structure in the variability of the basic reproductive number (R0) for Zika epidemics  
561 in the Pacific islands. eLife. 2016 Nov;5:e19874. Available from: <https://elifesciences.org/content/5/e19874v2>.  
562
- 563 [35] Ferguson N, Anderson R, Gupta S. The effect of antibody-dependent enhancement  
564 on the transmission dynamics and persistence of multiple-strain pathogens.  
565 Proceedings of the National Academy of Sciences of the United States of America.  
566 1999 Jan;96(2):790–794. Available from: [http://www.ncbi.nlm.nih.gov/pmc/articles/](http://www.ncbi.nlm.nih.gov/pmc/articles/PMC15215/)  
567 [PMC15215/](http://www.ncbi.nlm.nih.gov/pmc/articles/PMC15215/).
- 568 [36] Aguiar M, Ballesteros S, Kooi BW, Stollenwerk N. The role of seasonality and  
569 import in a minimalistic multi-strain dengue model capturing differences between  
570 primary and secondary infections: complex dynamics and its implications for data  
571 analysis. Journal of theoretical biology. 2011;289:181–196. Available from: [http://](http://www.sciencedirect.com/science/article/pii/S0022519311004462)  
572 [www.sciencedirect.com/science/article/pii/S0022519311004462](http://www.sciencedirect.com/science/article/pii/S0022519311004462).
- 573 [37] Chan M, Johansson MA. The Incubation Periods of Dengue Viruses. PLoS ONE.  
574 2012 Nov;7(11):e50972. Available from: <http://dx.doi.org/10.1371/journal.pone.0050972>.
- 575 [38] Liu-Helmersson J, Stenlund H, Wilder-Smith A, Rocklöv J. Vectorial Capacity of  
576 *Aedes aegypti*: Effects of Temperature and Implications for Global Dengue Epidemic  
577 Potential. PLoS ONE. 2014 Mar;9(3):e89783. Available from: [http://dx.plos.org/10.](http://dx.plos.org/10.1371/journal.pone.0089783)  
578 [1371/journal.pone.0089783](http://dx.plos.org/10.1371/journal.pone.0089783).
- 579 [39] Aguiar M, Kooi BW, Rocha F, Ghaffari P, Stollenwerk N. How much complexity is  
580 needed to describe the fluctuations observed in dengue hemorrhagic fever incidence

REFERENCES

REFERENCES

- 581 data? Ecological Complexity. 2013 Dec;16:31–40. Available from: <http://www.sciencedirect.com/science/article/pii/S1476945X12000670>.
- 582
- 583 [40] Thai KT, Binh TQ, Giao PT, Phuong HL, Hung LQ, Nam NV, et al. Seroprevalence  
584 of dengue antibodies, annual incidence and risk factors among children in southern  
585 Vietnam. Tropical Medicine & International Health. 2005;10(4):379–386. Available  
586 from: <http://onlinelibrary.wiley.com/doi/10.1111/j.1365-3156.2005.01388.x/full>.
- 587 [41] Dureau J, Ballesteros S, Bogich T. SSM: Inference for time series analysis with State  
588 Space Models; 2013. Available from: <https://github.com/JDureau/ssm/blob/master/doc/doc.pdf>.
- 589
- 590 [42] Bretó C, He D, Ionides EL, King AA. Time series analysis via mechanistic models.  
591 The Annals of Applied Statistics. 2009 Mar;3(1):319–348. Available from: <http://projecteuclid.org/euclid.aos/1239888373>.
- 592
- 593 [43] Carnell R. Package ‘lhs’; 2016. Available from: <http://cran.stat.auckland.ac.nz/web/packages/lhs/lhs.pdf>.
- 594
- 595 [44] Spiegelhalter DJ, Best NG, Carlin BP, Van Der Linde A. Bayesian measures of model  
596 complexity and fit. Journal of the Royal Statistical Society: Series B (Statistical  
597 Methodology). 2002 Oct;64(4):583–639. Available from: <http://onlinelibrary.wiley.com/doi/10.1111/1467-9868.00353/abstract>.
- 598
- 599 [45] R Development Core Team. R: A Language and Environment for Statistical  
600 Computing. Vienna, Austria: R Foundation for Statistical Computing; 2015. Available  
601 from: <http://www.R-project.org>.
- 602 [46] Wickham H. ggplot2: Elegant Graphics for Data Analysis. Springer-Verlag New York;  
603 2009. Available from: <http://ggplot2.org>.



*REFERENCES*

*REFERENCES*

- 604 [47] Johansson MA, Hombach J, Cummings DAT. Models of the impact of dengue  
605 vaccines: a review of current research and potential approaches. *Vaccine*.  
606 2011 Aug;29(35):5860–5868. Available from: [http://www.ncbi.nlm.nih.gov/pmc/articles/  
607 PMC4327892/](http://www.ncbi.nlm.nih.gov/pmc/articles/PMC4327892/).
- 608 [48] Imai N, Dorigatti I, Cauchemez S, Ferguson NM. Estimating Dengue Transmission  
609 Intensity from Sero-Prevalence Surveys in Multiple Countries. *PLoS Neglected  
610 Tropical Diseases*. 2015 Apr;9(4). Available from: [http://www.ncbi.nlm.nih.gov/pmc/  
611 articles/PMC4400108/](http://www.ncbi.nlm.nih.gov/pmc/articles/PMC4400108/).
- 612 [49] Imai N, Dorigatti I, Cauchemez S, Ferguson NM. Estimating Dengue Transmission  
613 Intensity from Case-Notification Data from Multiple Countries. *PLOS Negl Trop  
614 Dis*. 2016;10(7):e0004833. Available from: [http://journals.plos.org/plosntds/article?id=  
615 10.1371/journal.pntd.0004833](http://journals.plos.org/plosntds/article?id=10.1371/journal.pntd.0004833).
- 616 [50] Coudeville L, Garnett GP. Transmission Dynamics of the Four Dengue Serotypes  
617 in Southern Vietnam and the Potential Impact of Vaccination. *PLOS ONE*. 2012  
618 12;7(12):1–11. Available from: <https://doi.org/10.1371/journal.pone.0051244>.
- 619 [51] L’Azou M, Moureau A, Sarti E, Nealon J, Zambrano B, Wartel TA, et al. Symptomatic  
620 dengue in children in 10 Asian and Latin American countries. *New England Journal  
621 of Medicine*. 2016;374(12):1155–1166. Available from: [http://dx.doi.org/10.1056/  
622 NEJMoa1503877](http://dx.doi.org/10.1056/NEJMoa1503877).
- 623 [52] Prayitno A, Taurel AF, Nealon J, Satari HI, Karyanti MR, Sekartini R, et al.  
624 Dengue seroprevalence and force of primary infection in a representative population  
625 of urban dwelling Indonesian children. *PLOS Neglected Tropical Diseases*.  
626 2017;11(6):e0005621. Available from: [http://journals.plos.org/plosntds/article?id=10.  
627 1371/journal.pntd.0005621](http://journals.plos.org/plosntds/article?id=10.1371/journal.pntd.0005621).

*REFERENCES*

*REFERENCES*

- 628 [53] Vongpunsawad S, Intharasongkroh D, Thongmee T, Poovorawan Y. Seroprevalence  
629 of antibodies to dengue and chikungunya viruses in Thailand. PLOS ONE.  
630 2017;12(6):e0180560. Available from: <http://journals.plos.org/plosone/article?id=10.1371/journal.pone.0180560>.
- 632 [54] Ministry of Health, Singapore. Dengue review of 2016 and outlook for  
633 2017. Epidemiol News Bull. 2017 Apr;43(2):47–56. Available from:  
634 [https://www.moh.gov.sg/content/dam/moh\\_web/Publications/Epidemiological%20News%20Bulletin/ENB%20Quarterly\\_Apr%202017%20Vol%2043%20No%202%20\(Final\).pdf](https://www.moh.gov.sg/content/dam/moh_web/Publications/Epidemiological%20News%20Bulletin/ENB%20Quarterly_Apr%202017%20Vol%2043%20No%202%20(Final).pdf).
- 636 [55] Thai KTD, Nga TTT, Van Nam N, Phuong HL, Giao PT, Hung LQ, et al.  
637 Incidence of primary dengue virus infections in Southern Vietnamese children and  
638 reactivity against other flaviviruses. Tropical Medicine & International Health.  
639 2007 Dec;12(12):1553–1557. Available from: <http://onlinelibrary.wiley.com/doi/10.1111/j.1365-3156.2007.01964.x/abstract>.
- 641 [56] Tien NTK, Luxemburger C, Toan NT, Pollissard-Gadroy L, Huong VTQ, Van Be P,  
642 et al. A prospective cohort study of dengue infection in schoolchildren in Long Xuyen,  
643 Viet Nam. Transactions of the Royal Society of Tropical Medicine and Hygiene. 2010  
644 Sep;104(9):592–600. Available from: <https://academic.oup.com/trstmh/article-lookup/doi/10.1016/j.trstmh.2010.06.003>.
- 646 [57] Graham RR, Juffrie M, Tan R, Hayes CG, Laksono I, Ma'roef C, et al. A prospective  
647 seroepidemiologic study on dengue in children four to nine years of age in Yogyakarta,  
648 Indonesia I. studies in 1995-1996. The American Journal of Tropical Medicine and  
649 Hygiene. 1999 Sep;61(3):412–419.
- 650 [58] Stoddard ST, Forshey BM, Morrison AC, Paz-Soldan VA, Vazquez-Prokopec GM,  
651 Astete H, et al. House-to-house human movement drives dengue virus transmission.

REFERENCES

REFERENCES

- 652 Proceedings of the National Academy of Sciences of the United States of America.  
653 2013 Jan;110(3). Available from: <http://www.ncbi.nlm.nih.gov/pmc/articles/PMC3549073/>.
- 654 [59] Yoon IK, Rothman AL, Tannitisupawong D, Srikiatkachorn A, Jarman RG,  
655 Aldstadt J, et al. Underrecognized Mildly Symptomatic Viremic Dengue Virus  
656 Infections in Rural Thai Schools and Villages. *The Journal of Infectious Diseases*.  
657 2012 Aug;206(3):389–398. Available from: [http://www.ncbi.nlm.nih.gov/pmc/articles/](http://www.ncbi.nlm.nih.gov/pmc/articles/PMC3490697/)  
658 [PMC3490697/](http://www.ncbi.nlm.nih.gov/pmc/articles/PMC3490697/).
- 659 [60] Aguiar M, Paul R, Sakuntabhai A, Stollenwerk N. Are we modelling the correct  
660 dataset? Minimizing false predictions for dengue fever in Thailand. *Epidemiology &*  
661 *Infection*. 2014 Nov;142(11):2447–2459. Available from: [http://journals.cambridge.org/](http://journals.cambridge.org/article_S0950268813003348)  
662 [article\\_S0950268813003348](http://journals.cambridge.org/article_S0950268813003348).
- 663 [61] Rocha F, Aguiar M, Souza M, Stollenwerk N. Time-scale separation and centre  
664 manifold analysis describing vector-borne disease dynamics. *International Journal*  
665 *of Computer Mathematics*. 2013 Oct;90(10):2105–2125. Available from: [http://www.](http://www.tandfonline.com/doi/abs/10.1080/00207160.2013.783208)  
666 [tandfonline.com/doi/abs/10.1080/00207160.2013.783208](http://www.tandfonline.com/doi/abs/10.1080/00207160.2013.783208).
- 667 [62] Rocha F, Mateus L, Skwara U, Aguiar M, Stollenwerk N. Understanding dengue  
668 fever dynamics: a study of seasonality in vector-borne disease models. *International*  
669 *Journal of Computer Mathematics*. 2016 Aug;93(8):1405–1422. Available from: [http:](http://dx.doi.org/10.1080/00207160.2015.1050961)  
670 [//dx.doi.org/10.1080/00207160.2015.1050961](http://dx.doi.org/10.1080/00207160.2015.1050961).
- 671 [63] Dye C, Williams BG. Nonlinearities in the Dynamics of Indirectly-Transmitted  
672 Infections (or, does having a Vector makes a Difference ?). In: Grenfell BT, Dobson AP,  
673 editors. *Ecology of Infectious Diseases in Natural Populations*. Cambridge University  
674 Press; 1995. p. 260–279.
- 675 [64] Wichmann O, Yoon IK, Vong S, Limkittikul K, Gibbons RV, Mammen MP, et al.  
676 Dengue in Thailand and Cambodia: An Assessment of the Degree of Underrecognized

677 Disease Burden Based on Reported Cases. PLoS Neglected Tropical Diseases. 2011  
678 Mar;5(3):e996. Available from: <http://dx.plos.org/10.1371/journal.pntd.0000996>.

679 [65] Salje H, Lessler J, Berry IM, Melendrez MC, Endy T, Kalayanarooj S, et al. Dengue  
680 diversity across spatial and temporal scales: Local structure and the effect of host  
681 population size. Science. 2017 Mar;355(6331):1302–1306. Available from: [http://](http://science.sciencemag.org/content/355/6331/1302)  
682 [science.sciencemag.org/content/355/6331/1302](http://science.sciencemag.org/content/355/6331/1302).

683 [66] Cheng Q, Jing Q, Spear RC, Marshall JM, Yang Z, Gong P. The interplay of climate,  
684 intervention and imported cases as determinants of the 2014 dengue outbreak in  
685 Guangzhou. PLOS Neglected Tropical Diseases. 2017 06;11(6):1–24. Available  
686 from: <https://doi.org/10.1371/journal.pntd.0005701>.

687 [67] Reich NG, Lauer SA, Sakrejda K, Iamsirithaworn S, Hinjoy S, Suangtho P, et al.  
688 Challenges in Real-Time Prediction of Infectious Disease: A Case Study of Dengue in  
689 Thailand. PLOS Neglected Tropical Diseases. 2016;10(6):e0004761. Available from:  
690 <http://journals.plos.org/plosntds/article?id=10.1371/journal.pntd.0004761>.

## 691 **A Data and codes**

692 The datasets and codes supporting this article are available at [https://github.com/clchampag/](https://github.com/clchampag/KC-dengue)  
693 [KC-dengue](https://github.com/clchampag/KC-dengue).

## 694 **B Convergence diagnosis**

Figure 12 – **Trace plots for the MCMC algorithm, with 100,000 iterations.** a) SEIR. b)  
Laneri. c) Pandey. d) SEIAR. e) SEIR2. f) SEIR2psi

Figure 13 – **Correlation plots of the MCMC algorithm, with 100,000 iterations.** a)  
SEIR. b) Laneri. c) Pandey. d) SEIAR. e) SEIR2. f) SEIR2psi
